# Supplementary material for: Chiral coordination compounds with exceptional enantioselectivity
Source: Royal Society of Chemistry journal article supplement (doi:10.1039/d2tc04016f), 2022-01-01
Supplement: d2tc04016f1.pdf [file d2tc04016f1.pdf]

Electronic Supplementary Information (ESI) for

## **Chiral coordination compounds with exceptional enantioselectivity**

*Minju Lee and Kang Min Ok\**

Department of Chemistry, Sogang University, 35 Baekbeom-ro, Mapo-gu, Seoul 04107, Republic of  
Korea

## Table of Contents

| Sections                     | Titles                                                                                                                                                                          | pages   |
|------------------------------|---------------------------------------------------------------------------------------------------------------------------------------------------------------------------------|---------|
| <b>Materials and Methods</b> |                                                                                                                                                                                 | S3-S4   |
| <b>Scheme S1</b>             | Synthesis of ( <i>R,R</i> )-TBPG and ( <i>S,S</i> )-TBPG                                                                                                                        | S3      |
| <b>Table S1</b>              | Crystallographic Data for ( <i>R</i> )-Zn and ( <i>S</i> )-Zn                                                                                                                   | S4      |
| <b>Fig. S1</b>               | <sup>1</sup> H and <sup>13</sup> C NMR spectra for (a) ( <i>R,R</i> )-TBPG and (b) ( <i>S,S</i> )-TBPG                                                                          | S5-S6   |
| <b>Fig. S2</b>               | Ball-and-stick model revealing coordination modes of Zn <sup>2+</sup> cations and TBPG ligands in ( <i>R</i> )-Zn                                                               | S7      |
| <b>Table S2</b>              | Selected bond distances (Å) and selected bond angles (°) for ( <i>R</i> )-Zn                                                                                                    | S8      |
| <b>Table S3</b>              | Hydrogen bonds distances (Å) for ( <i>R</i> )-Zn                                                                                                                                | S9      |
| <b>Table S4</b>              | Selected bond distances (Å) and selected bond angles (°) for ( <i>S</i> )-Zn                                                                                                    | S10     |
| <b>Table S5</b>              | Hydrogen bonds distances (Å) for ( <i>S</i> )-Zn                                                                                                                                | S11     |
| <b>Fig. S3</b>               | Experimental and calculated powder X-ray diffraction patterns of ( <i>R</i> )-Zn and ( <i>S</i> )-Zn                                                                            | S12     |
| <b>Fig. S4</b>               | EDX data for ( <i>R</i> )-Zn and ( <i>S</i> )-Zn                                                                                                                                | S13     |
| <b>Fig. S5</b>               | IR spectra for ( <i>R,R</i> )-TBPG, ( <i>S,S</i> )-TBPG, ( <i>R</i> )-Zn and ( <i>S</i> )-Zn                                                                                    | S14     |
| <b>Fig. S6</b>               | UV-vis diffuse reflectance spectra for ( <i>R,R</i> )-TBPG, ( <i>S,S</i> )-TBPG, ( <i>R</i> )-Zn and ( <i>S</i> )-Zn                                                            | S15     |
| <b>Fig. S7</b>               | TGA diagrams for ( <i>R</i> )-Zn and ( <i>S</i> )-Zn                                                                                                                            | S16     |
| <b>Fig. S8</b>               | PXRD patterns measured after heating the title compounds to 800 °C                                                                                                              | S16     |
| <b>Fig. S9</b>               | (a) Solid-state CD spectra of ( <i>R,R</i> )-TBPG, ( <i>S,S</i> )-TBPG, ( <i>R</i> )-Zn, and ( <i>S</i> )-Zn. (b) Absorbance spectra of ( <i>R,R</i> )-TBPG and ( <i>R</i> )-Zn | S17     |
| <b>Fig. S10</b>              | Band structures for (a) ( <i>R</i> )-Zn and (b) ( <i>S</i> )-Zn                                                                                                                 | S18     |
| <b>Fig. S11</b>              | Total and partial density of states for (a) ( <i>R</i> )-Zn and (b) ( <i>S</i> )-Zn                                                                                             | S18     |
| <b>Fig. S12</b>              | Plots of SHG intensity versus particle size for ( <i>R</i> )-Zn and ( <i>S</i> )-Zn                                                                                             | S19     |
| <b>Table S6</b>              | Dipole moments for polyhedra in ( <i>R</i> )-Zn and ( <i>S</i> )-Zn                                                                                                             | S20     |
| <b>Fig. S13</b>              | Net moments and dipole moments of ZnO <sub>6</sub> polyhedra in a unit cell                                                                                                     | S20     |
| <b>Fig. S14</b>              | PXRD patterns revealing the stability of ( <i>R</i> )-Zn (a) in various solvents and (b) at various pH values.                                                                  | S21     |
| <b>Table S7</b>              | Crystallographic Data for ( <i>S</i> )-Zn-EtOH                                                                                                                                  | S22     |
| <b>Table S8</b>              | Selected bond distances (Å) and selected bond angles (°) for ( <i>S</i> )-Zn-EtOH                                                                                               | S23     |
| <b>Table S9</b>              | Hydrogen bonds distances (Å) for ( <i>S</i> )-Zn-EtOH                                                                                                                           | S24     |
| <b>Fig. S15</b>              | Experimental and calculated powder X-ray diffraction patterns of ( <i>S</i> )-Zn-EtOH                                                                                           | S25     |
| <b>Fig. S16</b>              | GC-MS results of distilled ethyl ether                                                                                                                                          | S26-S27 |
| <b>Fig. S17</b>              | GC-MS result of distilled ethyl ether containing ( <i>S</i> )-Zn crystal for 1 day                                                                                              | S28-S29 |
| <b>Fig. S18</b>              | GC-MS results of distilled ethyl ether containing ( <i>S</i> )-Zn for crystal 3 days                                                                                            | S30-S31 |
| <b>Fig. S19</b>              | GC-MS results of distilled ethyl ether containing ( <i>S</i> )-Zn for crystal 7 days                                                                                            | S32-S33 |
| <b>Fig. S20</b>              | GC-MS results of distilled ethyl ether containing ( <i>S</i> )-Zn for crystal 10 days                                                                                           | S34-S35 |
| <b>Fig. S21</b>              | GC-MS results of distilled ethyl ether containing ( <i>S</i> )-Zn for crystal 14 days                                                                                           | S36-S37 |
| <b>Fig. S22</b>              | GC-MS results of distilled ethyl ether containing Zn(NO <sub>3</sub> ) <sub>2</sub> for 1 day                                                                                   | S38-S39 |
| <b>Fig. S23</b>              | GC-MS results of distilled ethyl ether containing TBPG ligand for 1 day                                                                                                         | S40-S41 |
| <b>Fig. S24</b>              | Fluorescence emission spectra of ( <i>R</i> )-Zn and ( <i>R,R</i> )-TBPG in the solid state                                                                                     | S42     |
| <b>Fig. S25</b>              | PXRD patterns of ( <i>R</i> )-Zn before and after the fluorescence measurements                                                                                                 | S43     |
| <b>Fig. S26</b>              | Fluorescence emission spectra of ( <i>R,R</i> )-TBPG upon addition of (a) D- and (b) L-Histidine                                                                                | S44     |
| <b>Fig. S27</b>              | Stern-Volmer (SV) plots of ( <i>R,R</i> )-TBPG + D-Histidine and ( <i>R,R</i> )-TBPG + L-Histidine.                                                                             | S44     |
| <b>Fig. S28</b>              | Fluorescence emission spectra of ( <i>R</i> )-Zn upon addition of imidazole                                                                                                     | S45     |
| <b>Fig. S29</b>              | Stern-Volmer (SV) plots of ( <i>R</i> )-Zn + D-Histidine, ( <i>R</i> )-Zn + L-Histidine and ( <i>R</i> )-Zn + imidazole                                                         | S45     |
| <b>Fig. S30</b>              | <sup>1</sup> H NMR spectra for ( <i>R</i> )-Zn in DMSO-d <sub>6</sub> , ( <i>R</i> )-Zn + Histidine in DMSO-d <sub>6</sub> /D <sub>2</sub> O and Histidine in D <sub>2</sub> O  | S46     |
| <b>Fig. S31</b>              | Fluorescence emission spectra of ( <i>S</i> )-Zn upon addition of (a) D- and (b) L-Histidine                                                                                    | S47     |
| <b>Fig. S32</b>              | Stern-Volmer (SV) plots of ( <i>S</i> )-Zn + D-Histidine, ( <i>R</i> )-Zn + L-Histidine                                                                                         | S47     |

## Experimental Procedures

### Section S1. Materials and Methods

**Materials.** D-2-phenylglycine (99%, TCI), L-2-phenylglycine (98%, TCI),  $\text{Zn}(\text{NO}_3)_2 \cdot 6\text{H}_2\text{O}$  (99%, Alfa Aesar), NaOH (98%, Alfa Aesar), Terephthaloyl chloride (99%, Sigma Aldrich), Toluene (99.8%, Samchun), HCl (35~37 wt% aq. solution, Samchun), *N,N'*-dimethylacetamide (DMA, 99%, Alfa Aesar), ethanol (99.9%, Samchun), and dimethyl sulfoxide- $d_6$  (99%, Sigma Aldrich) were purchased and used without further purification.

**Synthesis of (*R,R*)-Terephthaloyl-bis-phenyl glycine [(*R,R*)-TBPG] and (*S,S*)-Terephthaloyl-bis-phenyl glycine [(*S,S*)-TBPG] ligands.** The (*R,R*)-TBPG ligand was synthesized by a nucleophilic aromatic substitution reaction (Scheme S1). A 1.5 g (10.0 mmol) portion of D-phenyl glycine and 0.6 g (15.0 mmol) of NaOH were placed in a round bottom flask and dissolved in 20 mL of water by stirring in an ice bath to cool the solution to below 10 °C. And then, 1.0 g (5.0 mmol) of terephthaloyl chloride dissolved in 20 mL of toluene solution was added dropwise to the mixture. After the reaction mixture was stirred for 1 h, the aqueous layer was separated from the organic layer and acidified with concentrated HCl aqueous solution. The white product was collected by a vacuum filtration and dried. (*S,S*)-TBPG was synthesized by the same method as that of (*R,R*)-TBPG using L-phenyl glycine instead of D-phenyl glycine. (*R,R*)-TBPG and (*S,S*)-TBPG were obtained in 92.0% and 93.5% yields, respectively.

**Scheme S1.** Synthesis of (*R,R*)-TBPG and (*S,S*)-TBPG

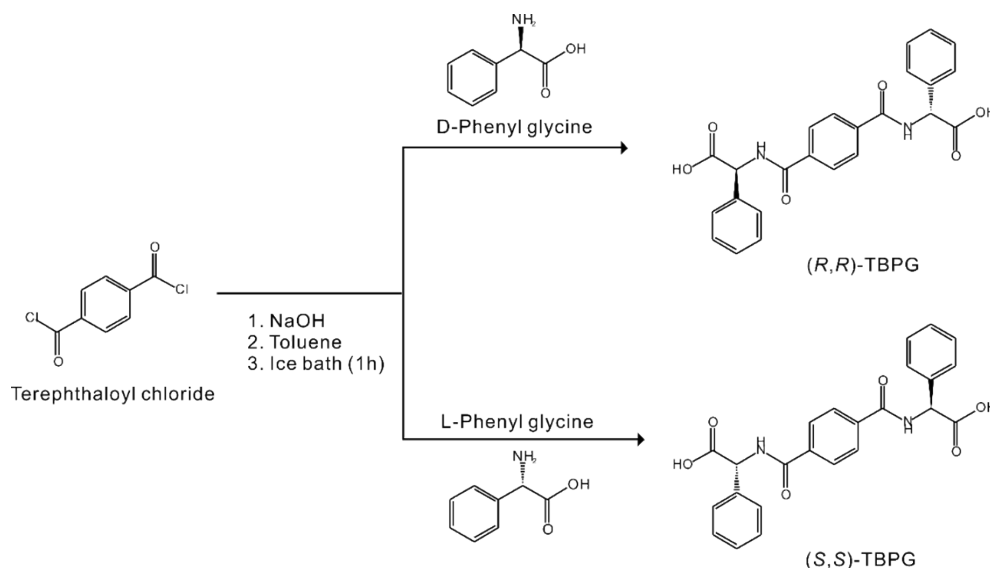

**Synthesis of  $[\text{Zn}_2((R,R)\text{-TBPG})_2(\text{H}_2\text{O})_5] \cdot 4\text{H}_2\text{O}$  [(*R*)-Zn] and  $[\text{Zn}_2((S,S)\text{-TBPG})_2(\text{H}_2\text{O})_5] \cdot 4\text{H}_2\text{O}$  [(*S*)-Zn].** A 0.089 g (0.3 mmol) portion of  $\text{Zn}(\text{NO}_3)_2 \cdot 6\text{H}_2\text{O}$ , 0.130 g (0.3 mmol) of (*R,R*)-TBPG or (*S,S*)-TBPG, 1 mL of DMA, 1 mL of deionized water, and 1 mL of ethanol were put into a Teflon-lined autoclave. After closing, the autoclave was heated at 80 °C for 72 h and cooled to room temperature at a rate of 6 °C/h. The clear solution was transferred to a vial and colorless plate-shaped crystals begin to grow after about 5 hours through slow evaporation. After 24 h, the complete product was filtered and washed with deionized water. Colorless crystals of (*R*)-Zn and (*S*)-Zn were obtained in 43% and 41% yields, respectively.

**Instrumentation.** Colorless plate shape single crystals with the size of 0.168 mm × 0.153 mm × 0.037 mm for (*R*)-Zn and 0.164 mm × 0.157 mm × 0.104 mm for (*S*)-Zn were used for single crystal X-ray diffraction (SC-XRD) analysis. SC-XRD data were collected using a Bruker D8 QUEST diffractometer with a graphite monochromated Mo K $\alpha$  radiation source ( $\lambda = 0.71703 \text{ \AA}$ ) and a PHOTON-II CPAD detector at 100 K at the Advanced Bio-Interface Core Research Facility, Sogang University. The collected data were integrated by the SAINT program<sup>1</sup> and absorption correction was performed using the program SADABS.<sup>2, 3</sup> The crystal structures were solved and refined with SHELXS-2013 and SHELXL-2013, respectively, implemented in the WinGX-2014.<sup>4-6</sup> Since the solvent molecules were severely disordered, the SQUEEZE option in the PLATON<sup>7, 8</sup> software was performed. The detailed crystallographic data for (*R*)-Zn and (*S*)-Zn are tabulated in Table S1. The diffraction data for (*S*)-Zn-EtOH were obtained using a synchrotron radiation (0.63000 Å) on the 2D Supramolecular Crystallography (2D-SMC) beamline equipped with a Rayonix MX225HS CCD area detector at 100k in Pohang Acceleration Laboratory (PAL). The data were integrated and scaled by the program HKL-3000sm.<sup>9</sup> The crystal structures were solved and refined with SHELXS-2013<sup>4</sup> and SHELXL-2013,<sup>5</sup> respectively, implemented in the WinGX-2014.<sup>6</sup> Since the solvent molecules were severely disordered, the SQUEEZE option in the PLATON<sup>7, 8</sup> software was performed. The detailed crystallographic data and selected bond lengths and selected bond angles for (*S*)-Zn-EtOH are tabulated in Tables S7-9.

**Table 1** Crystallographic Data for (*R*)-Zn and (*S*)-Zn

|                                            | ( <i>R</i> )-Zn | ( <i>S</i> )-Zn |
|--------------------------------------------|-----------------|-----------------|
| fw                                         | 1153.69         | 1153.69         |
| space group                                | $P2_1$          | $P2_1$          |
| <i>a</i> (Å)                               | 12.0803(13)     | 12.0909(7)      |
| <i>b</i> (Å)                               | 16.6380(18)     | 16.6580(10)     |
| <i>c</i> (Å)                               | 14.6323(16)     | 14.6039(8)      |
| $\beta$ (°)                                | 114.205(4)      | 114.138(2)      |
| <i>V</i> (Å <sup>3</sup> )                 | 2682.45(5)      | 2684.2(3)       |
| <i>Z</i>                                   | 2               | 2               |
| <i>T</i> (K)                               | 100(2)          | 100(2)          |
| $\lambda$ (Å)                              | 0.71073         | 0.71073         |
| $\rho_{\text{calcd}}$ (g/cm <sup>3</sup> ) | 1.428           | 1.410           |
| $R(F_o)^a$                                 | 0.0664          | 0.0461          |
| $R_w(F_o^2)^b$                             | 0.1047          | 0.0601          |
| Flack <i>x</i>                             | 0.042(6)        | 0.042(4)        |

$$^a R(F) = \sum ||F_o| - |F_c|| / \sum |F_o|. \quad ^b R_w(F_o^2) = [\sum w(F_o^2 - F_c^2)^2 / \sum w(F_o^2)]^{1/2}.$$

Powder X-ray diffraction (PXRD) data were collected on a Rigaku MiniFlex 600 using Cu K $\alpha$  ( $\lambda = 1.5406$  Å) radiation with 40 kV and 15 mA at room temperature. Polycrystalline samples were placed on the sample holders and then scanned in the  $2\theta$  range of 5–70° with a scan speed of 20° min<sup>-1</sup> and a scan step width of 0.02°.

Thermogravimetric analysis (TGA) diagrams of the title compounds were obtained by using a SCINCO TGA-N1000 thermal analyzer. The polycrystalline samples were placed on alumina crucibles and heated from 25 °C to 900 °C at a rate of 10 °C min<sup>-1</sup> under flowing air.

<sup>1</sup>H-NMR and <sup>13</sup>C-NMR spectral data of the samples were measured with a Varian Inova 400 spectrometer at 400 and 100 MHz, respectively.

Energy Dispersive X-ray Spectrometer (EDX) data were measured with a Horiba Energy EX-250 instrument equipped on a Hitachi S-3400N scanning electron microscope. The EDX data matched well with the calculated atomic ratios obtained from SC-XRD.

Elemental analysis was measured with a Thermo Scientific Flash 2000 on Sn capsules. Elemental analysis for (*R*)-Zn, observed (calculated): C, 49.97% (49.88%); H, 4.72% (4.74%); N, 4.84% (4.91%); (*S*)-Zn, observed (calculated): C, 49.91% (49.88%); H, 4.84 (4.74%); N, 4.82% (4.91%).

Infrared (IR) spectra were measured with a Thermo Scientific Nicolet iS50 FT-IR spectrometer in the range of 400–4000 cm<sup>-1</sup> with an attenuated total reflection (ATR) accessory.

UV-vis diffuse-reflectance spectra were measured with a Jasco V-660 spectrophotometer in the range of 200–800 nm. The band gap energy was calculated by the Kubelka-Munk function.<sup>10</sup>

Density functional theory (DFT) calculations for title compounds were performed to investigate the electronic structures using the Quantum Espresso package.<sup>11</sup> The ultrasoft pseudopotentials type<sup>12</sup> and the Perdew–Burke–Ernzerhof (PBE)<sup>13</sup> functionals were used for all elements (C, H, N, O, and Zn). The kinetic energy and charge density cutoff were set to 46.649 and 419.846 Ry, respectively. The self-consistent function (SCF) convergence thresholds were set to about  $4.0 \times 10^{-6}$  Ry and the k-points grids of Brillouin zone was set to  $2 \times 2 \times 2$ .

Solid state circular dichroism (CD) spectra were measured with a JASCO-J-815 spectrophotometer in the range of 220–325 nm after purging with nitrogen gas. The scanning speeds for the measurements were 50 nm min<sup>-1</sup>.

The fluorescence spectra were measured with a Hitachi F-7000 fluorescence spectrophotometer in the range of 600–800 nm. The scanning speeds for the measurements were 1200 nm min<sup>-1</sup>. The solid-state fluorescence measurements for (*R*)-Zn were performed at room temperature. To investigate the selective sensing capacity of (*R*)-Zn for Histidine, the ground polycrystalline sample of (*R*)-Zn (10 mg) was dispersed in water (3 mL) by ultrasonication and then subsequently placed in a cuvette with 1 cm width for the measurements. All the titrations were carried out by adding L- and D-Histidine (10 mM) gradually. The fluorescence spectra were recorded at 298 K with the emission wavelength at 680 nm ( $\lambda_{\text{ex}} = 340$  nm). Each measurement was repeated three times to obtain reliable data.

Powder second-harmonic generation (SHG) measurements were performed using a modified Kurtz nonlinear optical system.<sup>14</sup> Because the SHG efficiency depends on the particle size, the ground sample was sieved into specific particle size ranges (< 20, 20–45, 45–63, 63–75, 75–90, and 90–125  $\mu\text{m}$ ). Each sieved particle was put into separate capillary tubes. The tubes were irradiated by a DAWA Q-switched Nd:YAG laser (1064 nm), and the SHG light (532 nm) was received to a Hamamatsu photomultiplier tube and detected by a Tektronix TDS 1032 oscilloscope. A comprehensive SHG measurement was described earlier in the published paper.<sup>15</sup>



Fig. S1 <sup>1</sup>H and <sup>13</sup>C NMR spectra for (a) (*R,R*)-TBPG and (b) (*S,S*)-TBPG

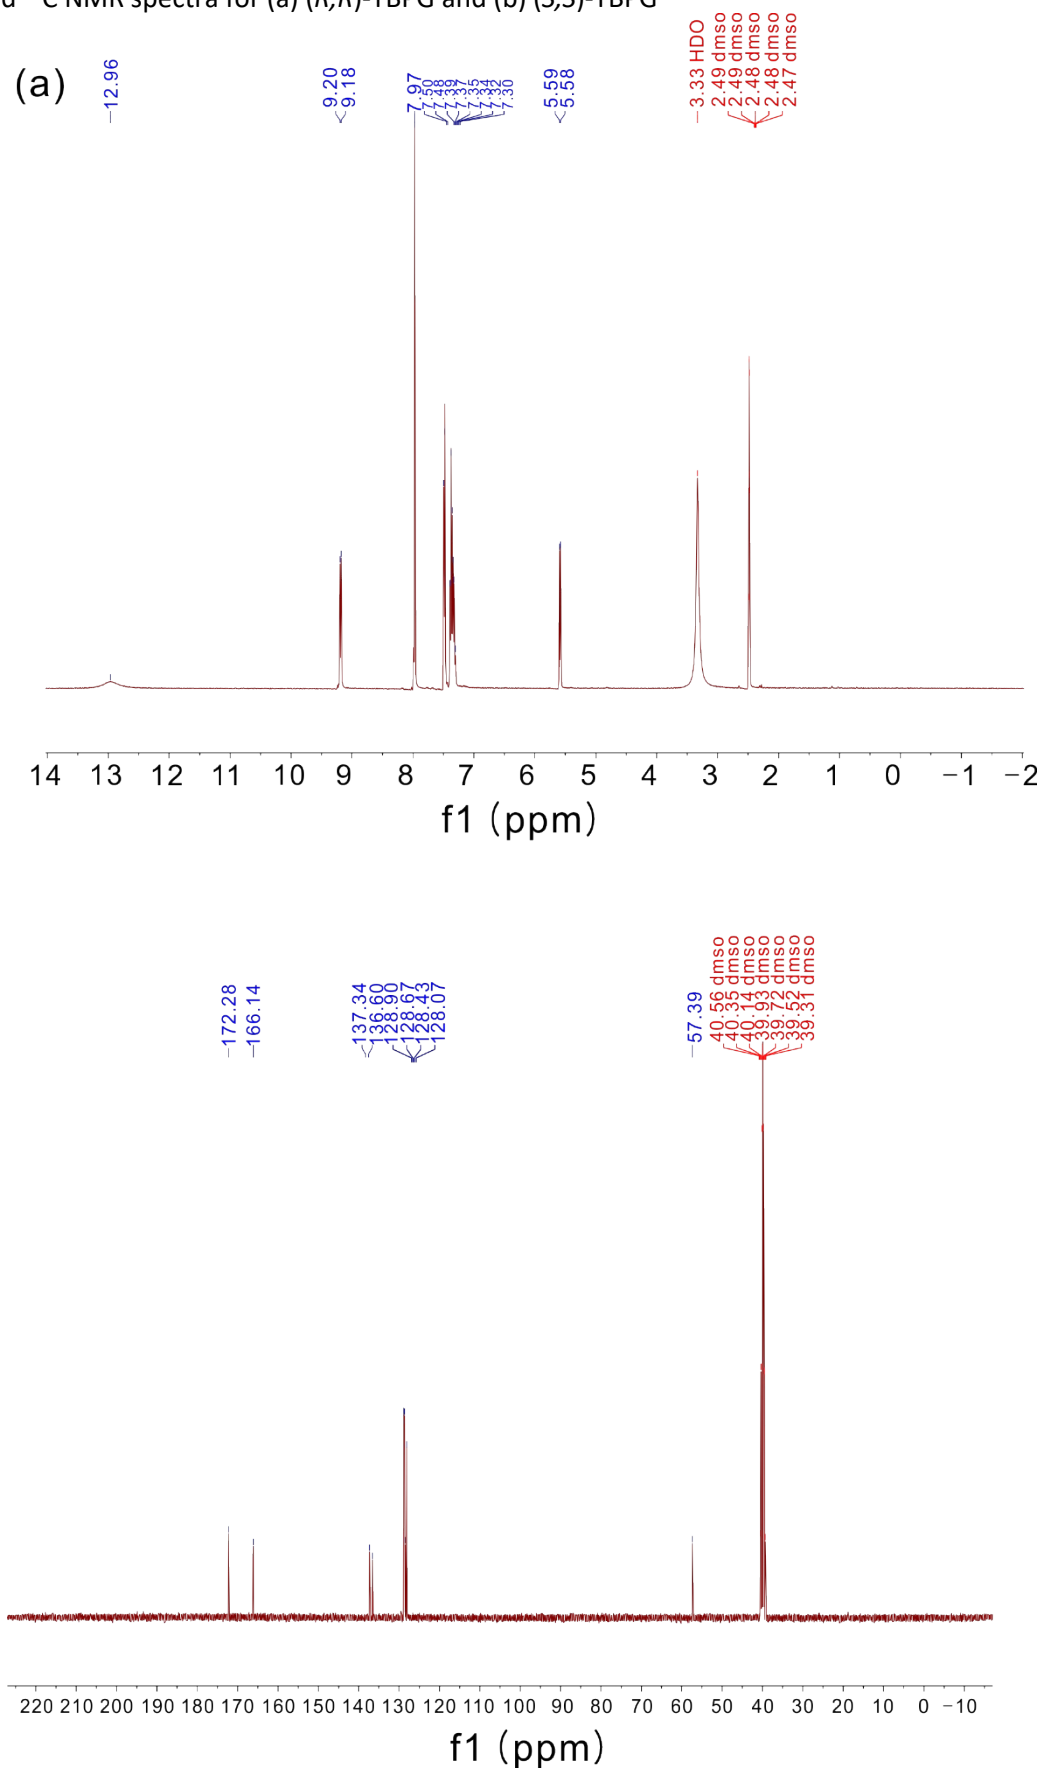

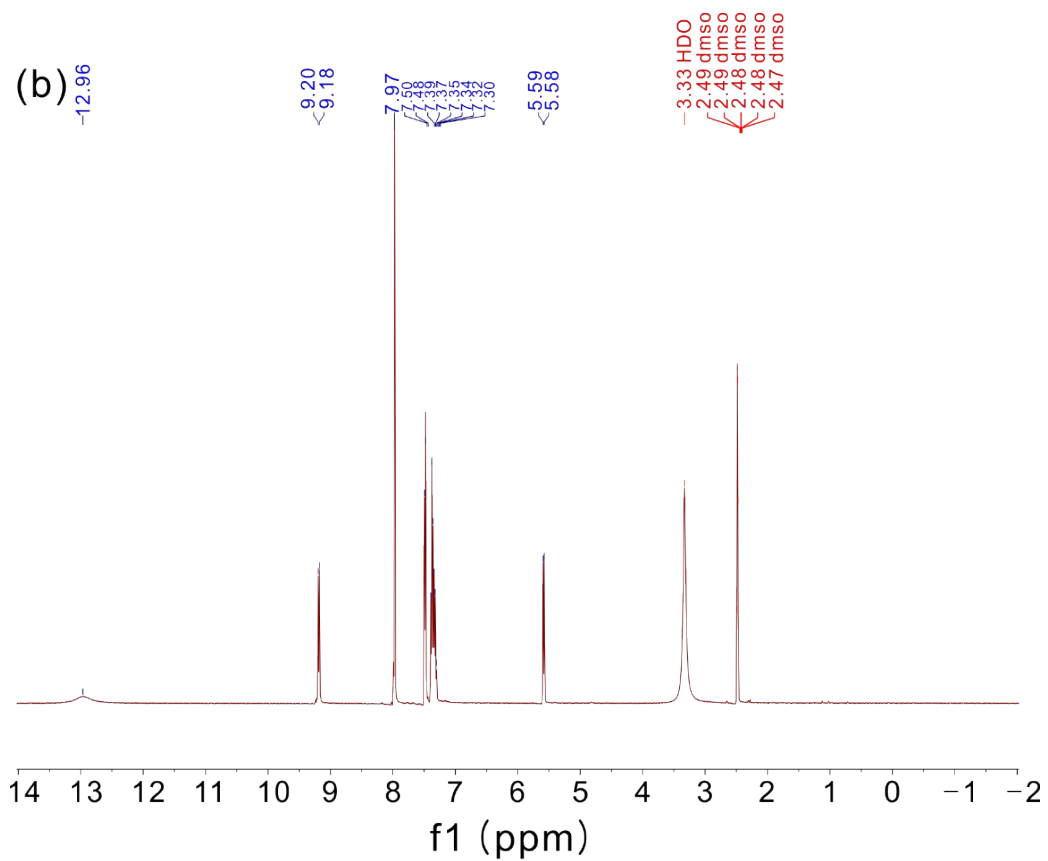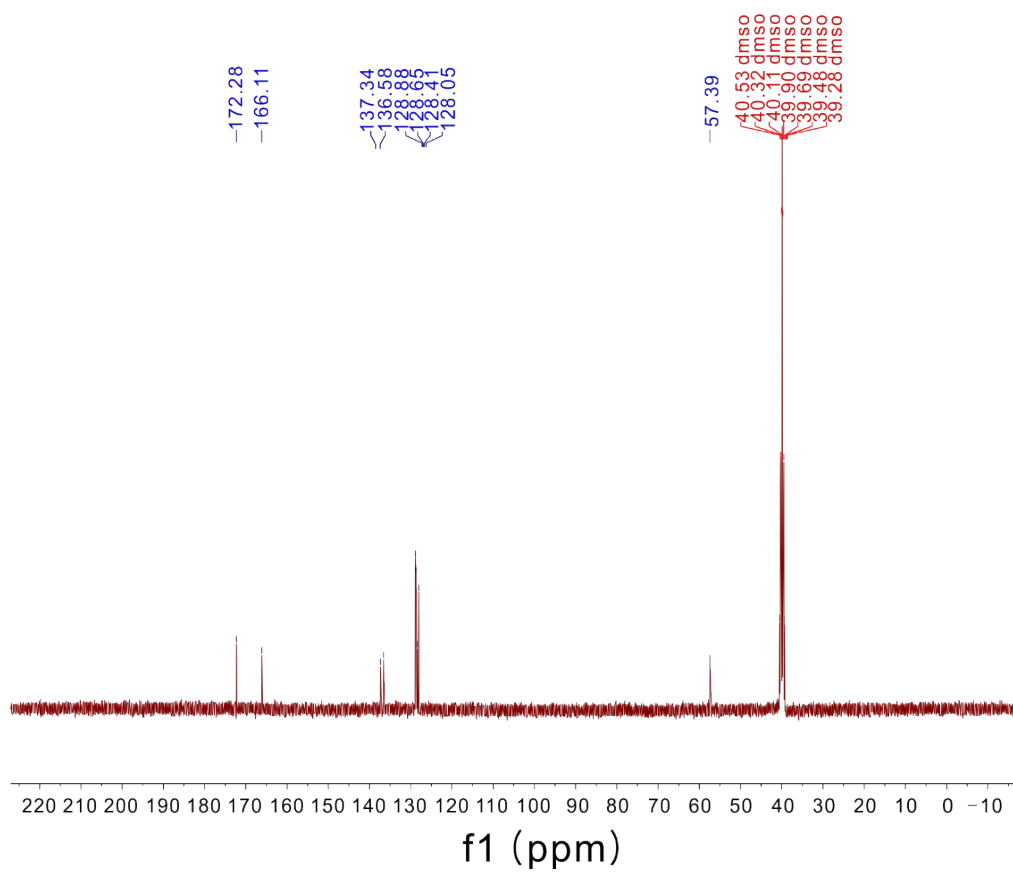

**Fig. S2** Ball-and-stick model revealing coordination modes of  $Zn^{2+}$  cations and TBPG ligands in (*R*)-Zn (cyan, Zn; black, C; red, O).

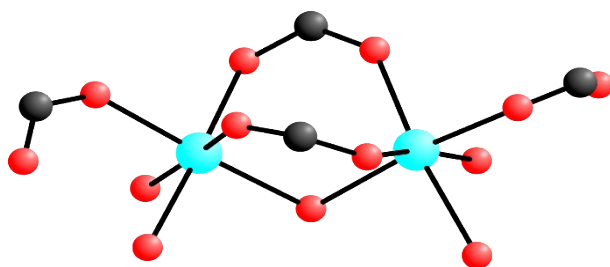

**Table S2** Selected bond distances (Å) and selected bond angles (°) for (*R*)-Zn

| Selected bond distances (Å)                                                                        |           |                       |           |                   |           |             |           |
|----------------------------------------------------------------------------------------------------|-----------|-----------------------|-----------|-------------------|-----------|-------------|-----------|
| Zn(1)-O(4)                                                                                         | 2.031(5)  | Zn(2)-O(11)           | 2.287(6)  | O(16)-C(48)       | 1.252(9)  | C(37)-C(40) | 1.494(10) |
| Zn(1)-O(17)#1                                                                                      | 2.074(5)  | O(4)-C(1)             | 1.252(8)  | O(17)-C(48)       | 1.259(8)  | C(41)-C(42) | 1.42(5)   |
| Zn(1)-O(13)#2                                                                                      | 2.086(5)  | O(5)-C(1)             | 1.257(9)  | C(1)-C(2)         | 1.531(10) | C(41)-C(48) | 1.548(10) |
| Zn(1)-O(1)                                                                                         | 2.096(6)  | O(6)-C(9)             | 1.244(9)  | C(2)-C(3)         | 1.503(11) | N(1)-C(9)   | 1.319(9)  |
| Zn(1)-O(3)                                                                                         | 2.136(5)  | O(7)-C(16)            | 1.244(8)  | C(9)-C(10)        | 1.496(10) | N(1)-C(2)   | 1.474(9)  |
| Zn(1)-O(2)#2                                                                                       | 2.163(6)  | O(8)-C(24)            | 1.258(9)  | C(13)-C(16)       | 1.500(10) | N(2)-C(16)  | 1.323(9)  |
| Zn(2)-O(12)                                                                                        | 2.027(5)  | O(9)-C(24)            | 1.267(9)  | C(17)-C(18)       | 1.525(10) | N(2)-C(17)  | 1.468(9)  |
| Zn(2)-O(16)#3                                                                                      | 2.042(5)  | O(12)-C(25)           | 1.267(8)  | C(17)-C(24)       | 1.522(10) | N(3)-C(33)  | 1.341(9)  |
| Zn(2)-O(9)                                                                                         | 2.056(5)  | O(13)-C(25)           | 1.248(9)  | C(25)-C(26)       | 1.518(10) | N(3)-C(26)  | 1.455(9)  |
| Zn(2)-O(10)                                                                                        | 2.072(5)  | O(14)-C(33)           | 1.232(9)  | C(26)-C(27)       | 1.523(10) | N(4)-C(40)  | 1.341(9)  |
| Zn(2)-O(2)                                                                                         | 2.186(5)  | O(15)-C(40)           | 1.231(10) | C(33)-C(34)       | 1.502(10) | N(4)-C(41)  | 1.464(9)  |
| Selected bond angles (°)                                                                           |           |                       |           |                   |           |             |           |
| O(1)-Zn(1)-O(2)#2                                                                                  | 90.3(2)   | O(16)#3-Zn(2)-O(10)   | 92.0(2)   | C(40)-N(4)-C(41)  | 122.4(7)  |             |           |
| O(1)-Zn(1)-O(3)                                                                                    | 85.1(2)   | O(16)#3-Zn(2)-O(11)   | 174.5(2)  | O(4)-C(1)-C(2)    | 116.1(6)  |             |           |
| O(2)-Zn(2)-O(11)                                                                                   | 89.6(2)   | O(17)#1-Zn(1)-O(1)    | 92.9(2)   | O(5)-C(1)-C(2)    | 116.7(6)  |             |           |
| O(3)-Zn(1)-O(2)#2                                                                                  | 92.7(2)   | O(17)#1-Zn(1)-O(2)#2  | 89.3(2)   | O(6)-C(9)-C(10)   | 119.5(7)  |             |           |
| O(4)-Zn(1)-O(1)                                                                                    | 85.7(2)   | O(17)#1-Zn(1)-O(3)    | 177.2(2)  | O(7)-C(16)-C(13)  | 119.2(6)  |             |           |
| O(4)-Zn(1)-O(2)#2                                                                                  | 173.1(2)  | O(17)#1-Zn(1)-O(13)#2 | 95.8(2)   | O(8)-C(24)-C(17)  | 117.5(7)  |             |           |
| O(4)-Zn(1)-O(3)                                                                                    | 92.7(20)  | Zn(1)#4-O(2)-Zn(2)    | 111.4(2)  | O(9)-C(24)-C(17)  | 116.7(6)  |             |           |
| O(4)-Zn(1)-O(13)#2                                                                                 | 90.29(19) | C(1)-O(4)-Zn(1)       | 130.6(5)  | O(12)-C(25)-C(26) | 115.5(6)  |             |           |
| O(4)-Zn(1)-O(17)#1                                                                                 | 85.2(2)   | C(24)-O(9)-Zn(2)      | 128.4(5)  | O(13)-C(25)-C(26) | 117.0(6)  |             |           |
| O(9)-Zn(2)-O(2)                                                                                    | 171.6(2)  | C(25)-O(12)-Zn(2)     | 131.3(5)  | O(14)-C(33)-C(34) | 121.7(6)  |             |           |
| O(9)-Zn(2)-O(10)                                                                                   | 92.4(2)   | C(25)-O(13)-Zn(1)#4   | 132.7(5)  | O(15)-C(40)-C(37) | 121.3(7)  |             |           |
| O(9)-Zn(2)-O(11)                                                                                   | 83.1(2)   | C(48)-O(16)-Zn(2)#5   | 134.5(5)  | O(16)-C(48)-C(41) | 117.1(6)  |             |           |
| O(10)-Zn(2)-O(2)                                                                                   | 91.0(2)   | C(48)-O(17)-Zn(1)#6   | 132.0(5)  | N(1)-C(2)-C(1)    | 110.2(6)  |             |           |
| O(10)-Zn(2)-O(11)                                                                                  | 84.9(2)   | O(4)-C(1)-O(5)        | 127.0(7)  | N(1)-C(2)-C(3)    | 114.2(6)  |             |           |
| O(12)-Zn(2)-O(2)                                                                                   | 87.9(2)   | O(8)-C(24)-O(9)       | 125.8(7)  | N(1)-C(9)-C(10)   | 117.7(6)  |             |           |
| O(12)-Zn(2)-O(11)                                                                                  | 83.9(2)   | O(13)-C(25)-O(12)     | 127.5(7)  | N(2)-C(16)-C(13)  | 119.1(6)  |             |           |
| O(12)-Zn(2)-O(9)                                                                                   | 87.2(2)   | O(16)-C(48)-O(17)     | 127.2(7)  | N(2)-C(17)-C(18)  | 112.7(6)  |             |           |
| O(12)-Zn(2)-O(10)                                                                                  | 168.7(2)  | O(6)-C(9)-N(1)        | 122.7(7)  | N(2)-C(17)-C(24)  | 109.7(6)  |             |           |
| O(12)-Zn(2)-O(16)#3                                                                                | 99.3(2)   | O(7)-C(16)-N(2)       | 121.7(7)  | N(3)-C(26)-C(25)  | 110.7(6)  |             |           |
| O(13)#2-Zn(1)-O(1)                                                                                 | 170.1(2)  | O(14)-C(33)-N(3)      | 121.4(7)  | N(3)-C(26)-C(27)  | 112.6(6)  |             |           |
| O(13)#2-Zn(1)-O(2)#2                                                                               | 94.4(2)   | O(15)-C(40)-N(4)      | 121.3(7)  | N(3)-C(33)-C(34)  | 116.9(6)  |             |           |
| O(13)#2-Zn(1)-O(3)                                                                                 | 86.0(2)   | C(9)-N(1)-C(2)        | 122.2(6)  | N(4)-C(40)-C(37)  | 117.4(7)  |             |           |
| O(16)#3-Zn(2)-O(2)                                                                                 | 94.9(2)   | C(16)-N(2)-C(17)      | 119.7(6)  | N(4)-C(41)-C(42)  | 110.6(13) |             |           |
| O(16)#3-Zn(2)-O(9)                                                                                 | 92.6(2)   | C(33)-N(3)-C(26)      | 120.4(6)  | N(4)-C(41)-C(48)  | 107.3(6)  |             |           |
| Symmetry operation : #1 x-1,y+1,z-1 #2 x,y+1,z #3 x-1,y,z-1 #4 x,y-1,z #5 x+1,y,z+1 #6 x+1,y-1,z+1 |           |                       |           |                   |           |             |           |

**Table S3** Hydrogen bonds distances (Å) for (*R*)-Zn

| D-H...A                                                                                  | d(D...A) | D-H...A               | d(D...A)  |
|------------------------------------------------------------------------------------------|----------|-----------------------|-----------|
| N(1)-H(1)...O(18)#1                                                                      | 2.968(8) | O(10)-H(55)...O(7)#9  | 2.732(7)  |
| N(2)-H(2A)...O(19)                                                                       | 3.477(9) | O(11)-H(56)...O(19)   | 2.812(9)  |
| O(1)-H(48)...O(14)#7                                                                     | 2.734(7) | O(18)-H(58)...O(8)#8  | 2.868(8)  |
| O(2)-H(50)...O(20)                                                                       | 2.600(8) | O(18)-H(59)...O(17)   | 2.825(7)  |
| O(2)-H(51)...O(21)                                                                       | 2.634(8) | O(19)-H(60)...O(12)   | 2.762(8)  |
| O(3)-H(52)...O(4)                                                                        | 3.016(7) | O(19)-H(61)...O(5) #8 | 2.840 (8) |
| O(3)-H(52)...O(5)                                                                        | 2.738(7) | O(20)-H(62)...O(6)#8  | 2.728(8)  |
| O(3)-H(53)...O(6)#7                                                                      | 2.796(8) | O(20)-H(63)...O(11)   | 2.756(9)  |
| O(10)-H(54)...O(8)                                                                       | 2.638(8) | O(21)-H(64)...O(7)#9  | 2.804(9)  |
| Symmetry operation : #1 x-1,y+1,z-1 #7 -x+1,y+1/2,-z+1 #8 -x+1,y-1/2,-z+1 #9 -x,y-1/2,-z |          |                       |           |

**Table S4** Selected bond distances (Å) and selected bond angles (°) for (*S*)-Zn

| Selected bond distances (Å)                                                                        |            |                       |            |                   |          |             |          |
|----------------------------------------------------------------------------------------------------|------------|-----------------------|------------|-------------------|----------|-------------|----------|
| Zn(1)-O(4)                                                                                         | 2.042(3)   | Zn(2)-O(11)           | 2.284(4)   | O(16)-C(48)       | 1.257(6) | C(37)-C(40) | 1.501(7) |
| Zn(1)-O(17)#1                                                                                      | 2.071(3)   | O(4)-C(1)             | 1.252(6)   | O(17)-C(48)       | 1.255(6) | C(41)-C(42) | 1.47(4)  |
| Zn(1)-O(13)#2                                                                                      | 2.079(3)   | O(5)-C(1)             | 1.248(6)   | C(1)-C(2)         | 1.533(6) | C(41)-C(48) | 1.540(7) |
| Zn(1)-O(1)                                                                                         | 2.102(4)   | O(6)-C(9)             | 1.252(5)   | C(2)-C(3)         | 1.520(7) | N(1)-C(9)   | 1.318(6) |
| Zn(1)-O(3)                                                                                         | 2.144(3)   | O(7)-C(16)            | 1.242(6)   | C(9)-C(10)        | 1.503(6) | N(1)-C(2)   | 1.475(6) |
| Zn(1)-O(2)                                                                                         | 2.160(3)   | O(8)-C(24)            | 1.250(5)   | C(13)-C(16)       | 1.500(6) | N(2)-C(16)  | 1.336(6) |
| Zn(2)-O(12)                                                                                        | 2.023(3)   | O(9)-C(24)            | 1.270(5)   | C(17)-C(18)       | 1.520(7) | N(2)-C(17)  | 1.465(6) |
| Zn(2)-O(16)#3                                                                                      | 2.039(4)   | O(12)-C(25)           | 1.259(5)   | C(17)-C(24)       | 1.527(7) | N(3)-C(33)  | 1.343(6) |
| Zn(2)-O(9)                                                                                         | 2.050(3)   | O(13)-C(25)           | 1.245(6)   | C(25)-C(26)       | 1.539(6) | N(3)-C(26)  | 1.461(5) |
| Zn(2)-O(10)                                                                                        | 2.067(3)   | O(14)-C(33)           | 1.222(6)   | C(26)-C(27)       | 1.511(7) | N(4)-C(40)  | 1.342(6) |
| Zn(2)-O(2)#4                                                                                       | 2.188(3)   | O(15)-C(40)           | 1.225(6)   | C(33)-C(34)       | 1.502(6) | N(4)-C(41)  | 1.461(6) |
| Selected bond angles (°)                                                                           |            |                       |            |                   |          |             |          |
| O(1)-Zn(1)-O(2)                                                                                    | 90.23(14)  | O(16)#3-Zn(2)-O(10)   | 91.90(14)  | C(40)-N(4)-C(41)  | 121.3(4) |             |          |
| O(1)-Zn(1)-O(3)                                                                                    | 85.13(14)  | O(16)#3-Zn(2)-O(11)   | 174.54(14) | O(4)-C(1)-C(2)    | 115.6(4) |             |          |
| O(2)#4-Zn(2)-O(11)                                                                                 | 89.85(13)  | O(17)#1-Zn(1)-O(1)    | 93.01(14)  | O(5)-C(1)-C(2)    | 117.0(4) |             |          |
| O(3)-Zn(1)-O(2)                                                                                    | 92.87(13)  | O(17)#1-Zn(1)-O(2)    | 88.89(13)  | O(6)-C(9)-C(10)   | 119.0(4) |             |          |
| O(4)-Zn(1)-O(1)                                                                                    | 85.69(14)  | O(17)#1-Zn(1)-O(3)    | 177.44(13) | O(7)-C(16)-C(13)  | 120.1(4) |             |          |
| O(4)-Zn(1)-O(2)                                                                                    | 172.90(13) | O(17)#1-Zn(1)-O(13)#2 | 95.56(14)  | O(8)-C(24)-C(17)  | 117.7(4) |             |          |
| O(4)-Zn(1)-O(3)                                                                                    | 92.57(13)  | Zn(1)-O(2)-Zn(2)#2    | 111.44(15) | O(9)-C(24)-C(17)  | 116.1(4) |             |          |
| O(4)-Zn(1)-O(13)#2                                                                                 | 90.43(12)  | C(1)-O(4)-Zn(1)       | 130.2(3)   | O(12)-C(25)-C(26) | 115.0(4) |             |          |
| O(4)-Zn(1)-O(17)#1                                                                                 | 85.53(13)  | C(24)-O(9)-Zn(2)      | 128.4(3)   | O(13)-C(25)-C(26) | 117.5(4) |             |          |
| O(9)-Zn(2)-O(2)#4                                                                                  | 172.02(13) | C(25)-O(12)-Zn(2)     | 131.7(3)   | O(14)-C(33)-C(34) | 121.7(4) |             |          |
| O(9)-Zn(2)-O(10)                                                                                   | 92.10(13)  | C(25)-O(13)-Zn(1)#4   | 132.7(3)   | O(15)-C(40)-C(37) | 121.2(4) |             |          |
| O(9)-Zn(2)-O(11)                                                                                   | 83.18(13)  | C(48)-O(16)-Zn(2)#5   | 134.5(3)   | O(16)-C(48)-C(41) | 117.1(4) |             |          |
| O(10)-Zn(2)-O(2)#4                                                                                 | 91.17(13)  | C(48)-O(17)-Zn(1)#6   | 132.5(3)   | N(1)-C(2)-C(3)    | 113.6(4) |             |          |
| O(10)-Zn(2)-O(11)                                                                                  | 85.03(14)  | O(5)-C(1)-O(4)        | 127.4(4)   | N(1)-C(2)-C(1)    | 110.6(4) |             |          |
| O(12)-Zn(2)-O(2)#4                                                                                 | 87.90(13)  | O(8)-C(24)-O(9)       | 126.2(4)   | N(1)-C(9)-C(10)   | 117.6(4) |             |          |
| O(12)-Zn(2)-O(9)                                                                                   | 87.52(13)  | O(13)-C(25)-O(12)     | 127.4(4)   | N(2)-C(16)-C(13)  | 119.3(4) |             |          |
| O(12)-Zn(2)-O(10)                                                                                  | 169.13(14) | O(17)-C(48)-O(16)     | 126.7(5)   | N(2)-C(17)-C(18)  | 113.1(4) |             |          |
| O(12)-Zn(2)-O(11)                                                                                  | 84.14(13)  | O(6)-C(9)-N(1)        | 123.4(4)   | N(2)-C(17)-C(24)  | 110.1(4) |             |          |
| O(12)-Zn(2)-O(16)#3                                                                                | 98.97(14)  | O(7)-C(16)-N(2)       | 120.6(4)   | N(3)-C(26)-C(27)  | 112.8(4) |             |          |
| O(13)#2-Zn(1)-O(1)                                                                                 | 170.29(14) | O(14)-C(33)-N(3)      | 121.6(4)   | N(3)-C(26)-C(25)  | 109.6(4) |             |          |
| O(13)#2-Zn(1)-O(2)                                                                                 | 94.49(13)  | O(15)-C(40)-N(4)      | 122.3(4)   | N(3)-C(33)-C(34)  | 116.7(4) |             |          |
| O(13)#2-Zn(1)-O(3)                                                                                 | 86.16(14)  | C(9)-N(1)-C(2)        | 121.1(4)   | N(4)-C(40)-C(37)  | 116.5(5) |             |          |
| O(16)#3-Zn(2)-O(2)#4                                                                               | 94.73(14)  | C(16)-N(2)-C(17)      | 120.0(4)   | N(4)-C(41)-C(42)  | 111.8(1) |             |          |
| O(16)#3-Zn(2)-O(9)                                                                                 | 92.44(14)  | C(33)-N(3)-C(26)      | 119.7(4)   | N(4)-C(41)-C(48)  | 107.5(4) |             |          |
| Symmetry operation : #1 x-1,y-1,z-1 #2 x,y-1,z #3 x-1,y,z-1 #4 x,y+1,z #5 x+1,y,z+1 #6 x+1,y+1,z+1 |            |                       |            |                   |          |             |          |

**Table S5** Hydrogen bonds distances (Å) for (S)-Zn

| D-H...A                                                                                                             | d(D...A) | D-H...A               | d(D...A) |
|---------------------------------------------------------------------------------------------------------------------|----------|-----------------------|----------|
| N(1)-H(1)...O(18)#1                                                                                                 | 2.967(5) | O(10)-H(55)...O(8)    | 2.626(5) |
| N(2)-H(2A)...O(19)                                                                                                  | 3.468(6) | O(11)-H(57)...O(19)   | 2.814(5) |
| O(1)-H(48)...O(14)#10                                                                                               | 2.743(5) | O(18)-H(58)...O(17)   | 2.833(5) |
| O(2)-H(50)...O(20)                                                                                                  | 2.640(5) | O(18)-H(59)...O(8)#8  | 2.862(5) |
| O(2)-H(51)...O(21)                                                                                                  | 2.613(5) | O(19)-H(60)...O(5)#8  | 2.843(5) |
| O(3)-H(52)...O(6)#10                                                                                                | 2.799(5) | O(19)-H(61)...O(12)   | 2.773(5) |
| O(3)-H(53)...O(4)                                                                                                   | 3.027(5) | O(20)-H(63)...O(7)#9  | 2.808(5) |
| O(3)-H(53)...O(5)                                                                                                   | 2.744(5) | O(21)-H(64)...O(6)#10 | 2.716(5) |
| O(10)-H(54)...O(7)#7                                                                                                | 2.743(5) | O(21)-H(65)...O(11)#2 | 2.749(6) |
| Symmetry operation : #1 x-1,y-1,z-1 #2 x,y-1,z #7 -x,y+1/2,-z #8 -x+1,y+1/2,-z+1 #9 -x,y-1/2,-z #10 -x+1,y-1/2,-z+1 |          |                       |          |

**Fig. S3** Experimental and calculated powder X-ray diffraction patterns of (*R*)-Zn and (*S*)-Zn

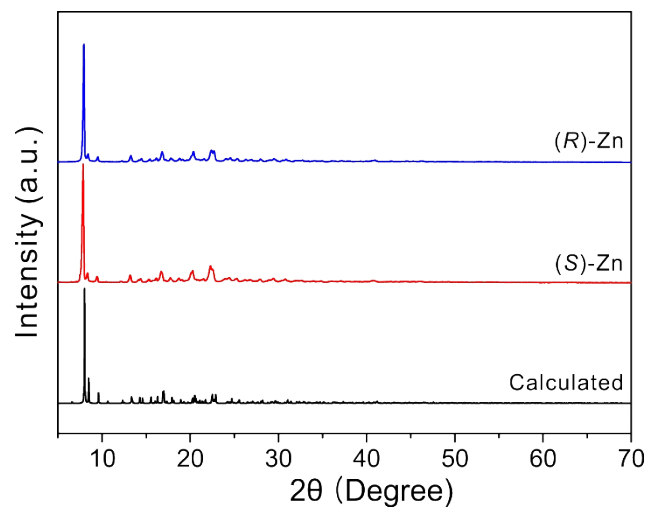



Fig. S4 SEM-EDX data for (R)-Zn and (S)-Zn

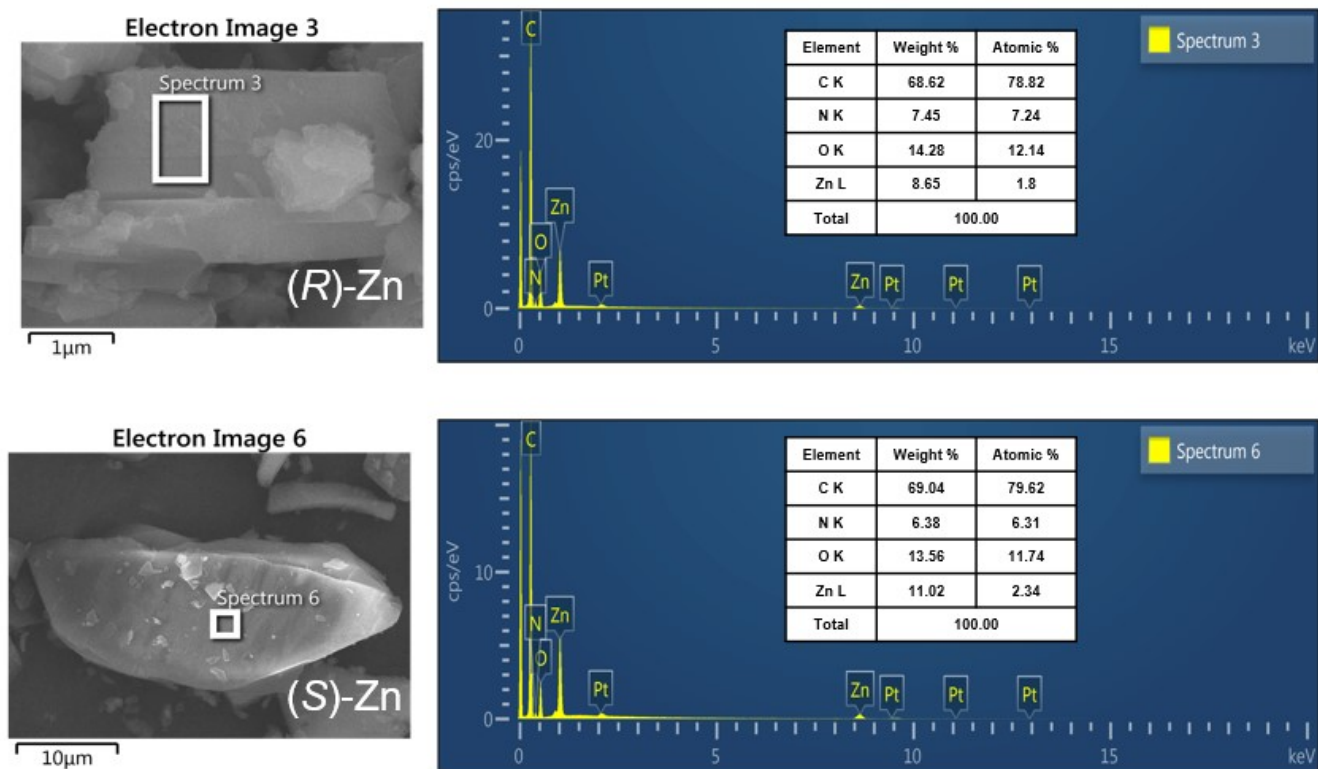

**Fig. S5** IR spectra for (*R,R*)-TBPG, (*S,S*)-TBPG, (*R*)-Zn and (*S*)-Zn

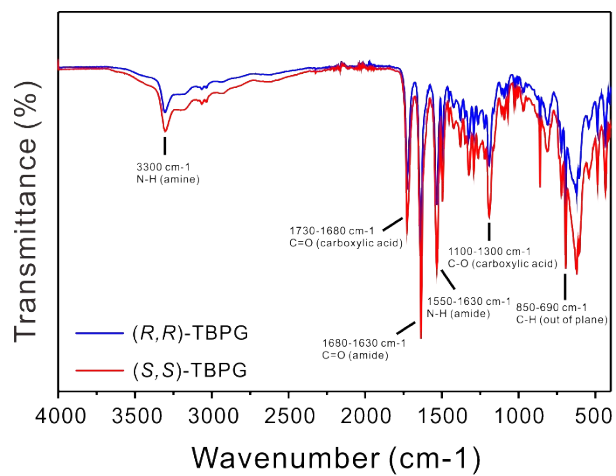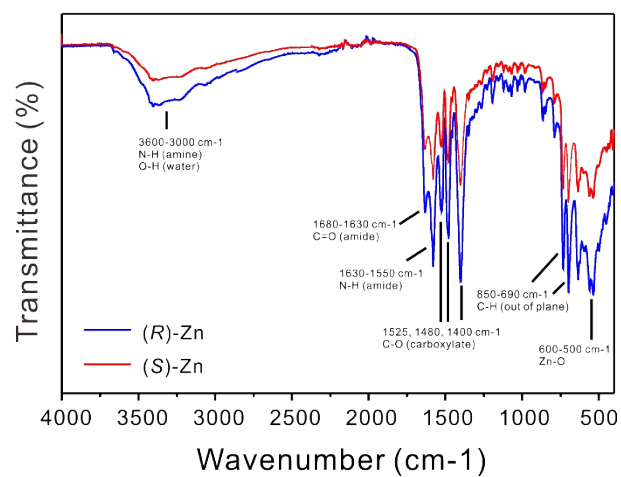

**Fig. S6** UV-vis diffuse reflectance spectra for (*R,R*)-TBPG, (*S,S*)-TBPG, (*R*)-Zn and (*S*)-Zn

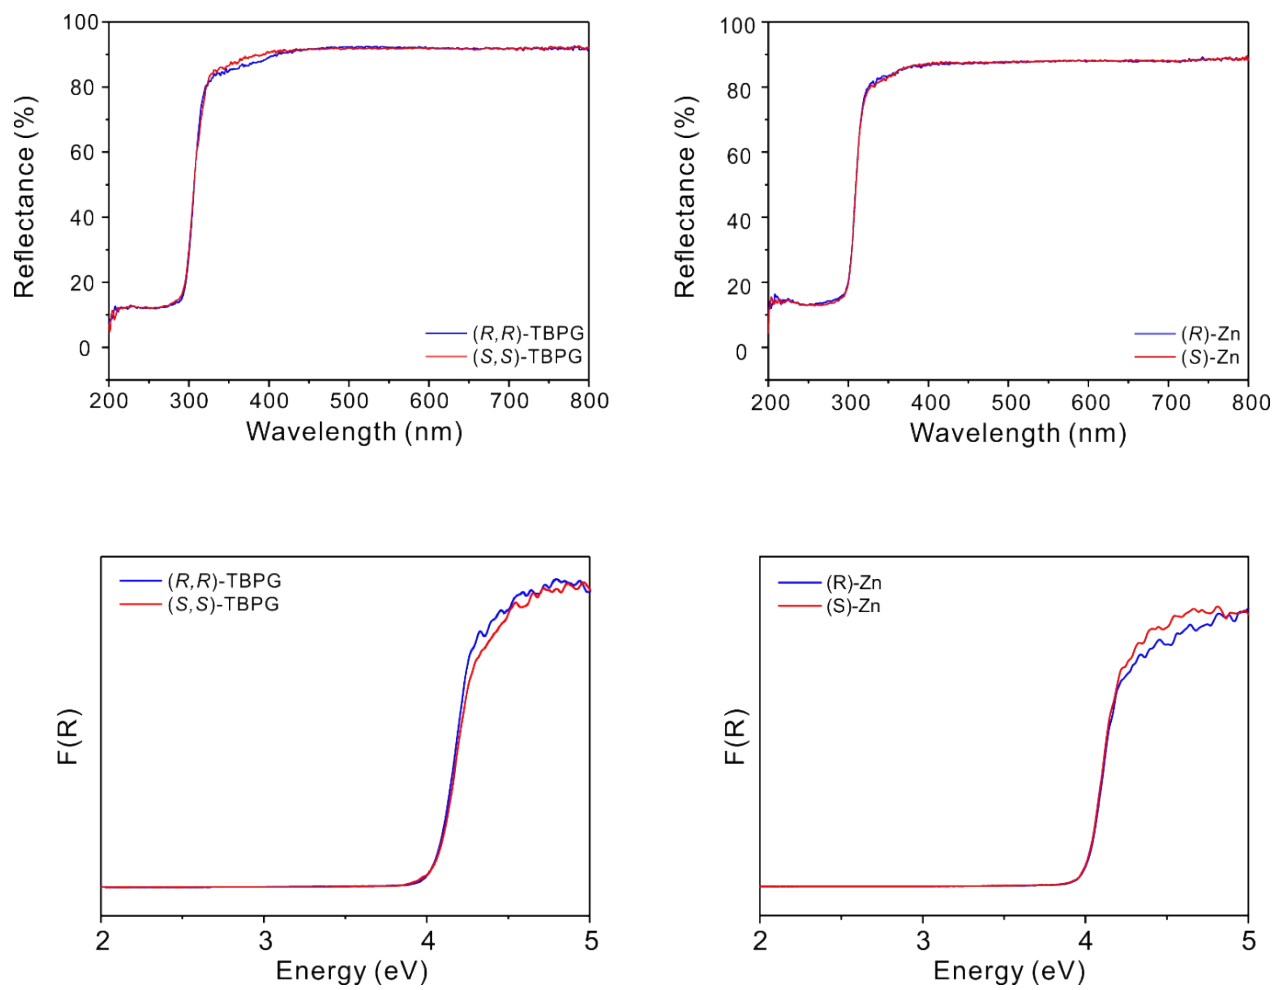

**Fig. S7** TGA diagrams for (*R*)-Zn and (*S*)-Zn

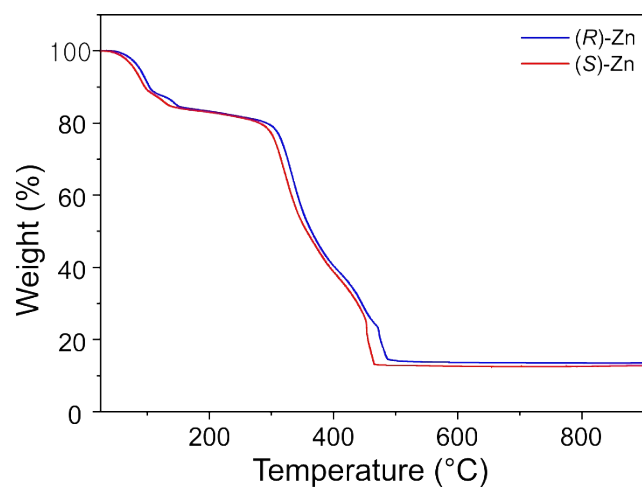

**Fig. S8** PXRD patterns measured after heating the samples to 800 °C

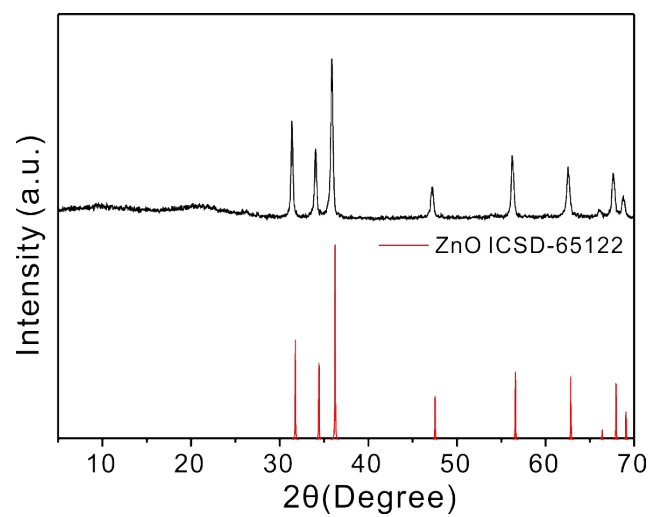

**Fig. S9** (a) Solid-state CD spectra of (*R,R*)-TBPG, (*S,S*)-TBPG, (*R*)-Zn, and (*S*)-Zn. (b) Absorbance spectra of (*R,R*)-TBPG and (*R*)-Zn.

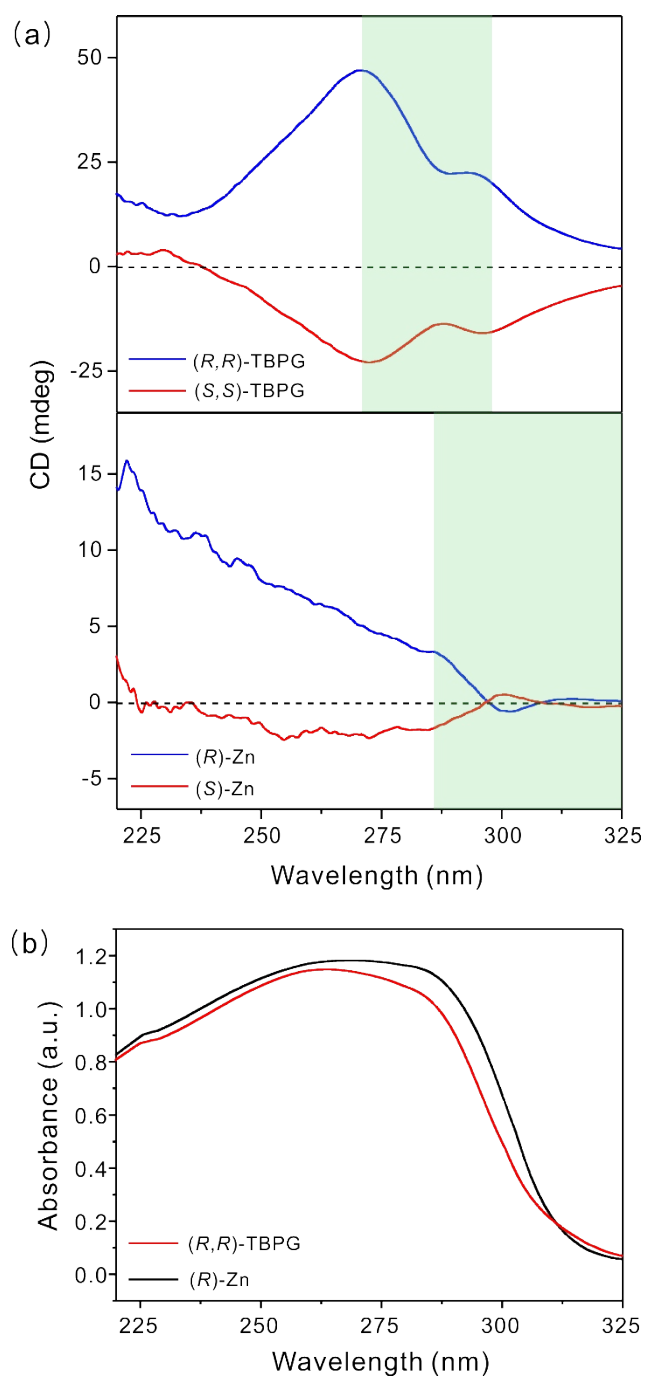

**Fig. S10** Band structures for (a) (*R*)-Zn and (b) (*S*)-Zn. Arrows represent the optical transition from the valence band maximum to the conduction band minimum.

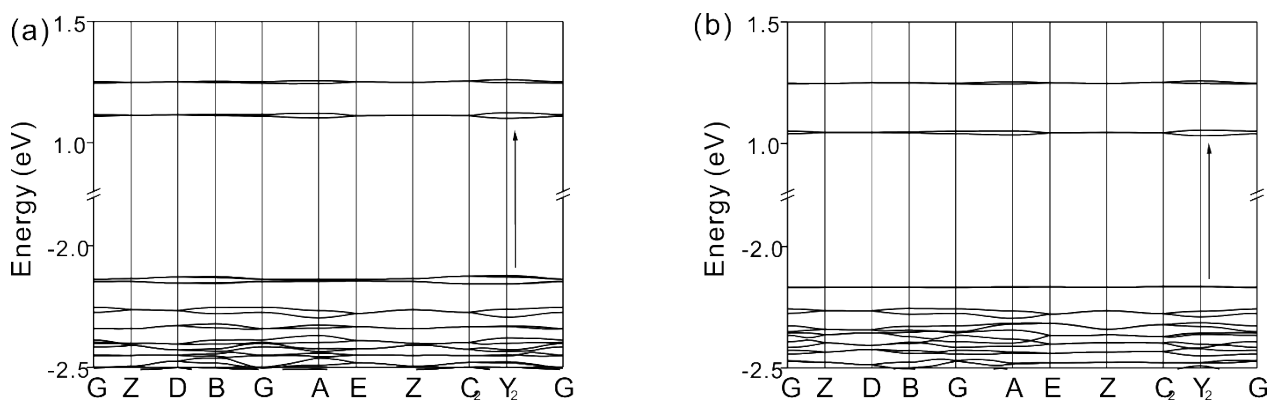

**Fig. S11** Total and partial density of states for (a) (*R*)-Zn and (b) (*S*)-Zn

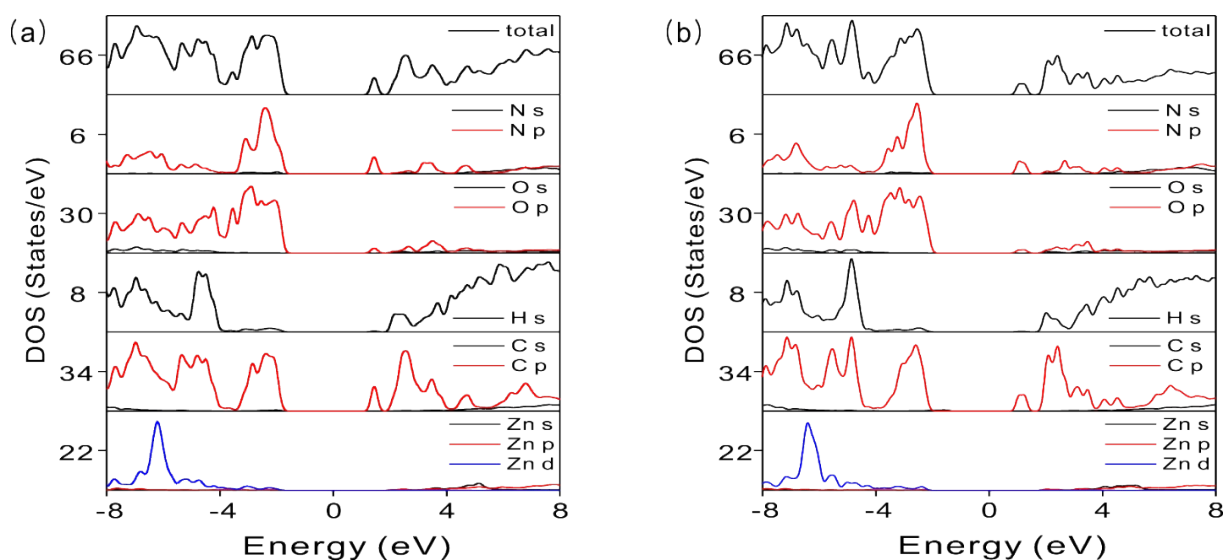

**Fig. S12** Plots of SHG intensity versus particle size for (R)-Zn and (S)-Zn

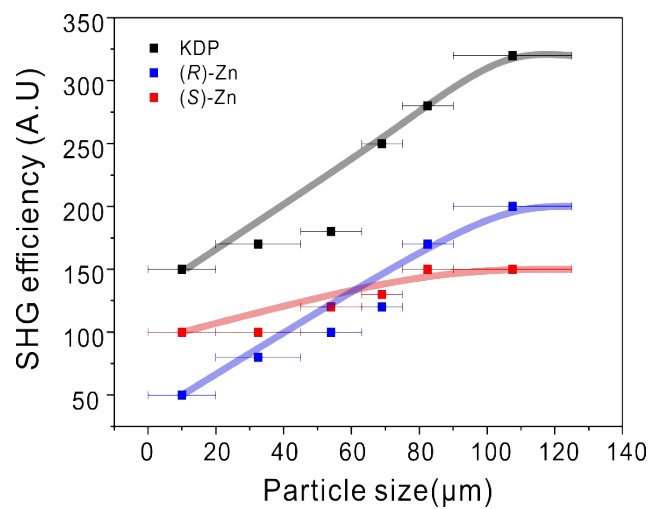

**Table S6** Dipole moments for polyhedra in (R)-Zn and (S)-Zn

| Compound      | Unit                 | Magnitude | Dipole moment (D) |       |       |
|---------------|----------------------|-----------|-------------------|-------|-------|
|               |                      |           | x                 | y     | z     |
| <b>(R)-Zn</b> | ZnO <sub>6</sub> (1) | 3.71D     | -1.01             | 3.57  | -0.06 |
|               | ZnO <sub>6</sub> (2) | 2.93 D    | -0.05             | -2.63 | -1.28 |
|               | ZnO <sub>6</sub> (3) | 3.71 D    | 1.01              | 3.57  | 0.06  |
|               | ZnO <sub>6</sub> (4) | 2.93 D    | 0.05              | -2.63 | 1.28  |
|               | Net                  | 1.87D     | 0                 | 1.87  | 0     |
| <b>(S)-Zn</b> | ZnO <sub>6</sub> (1) | 2.85 D    | -0.16             | 2.59  | 1.17  |
|               | ZnO <sub>6</sub> (2) | 3.62 D    | 0.82              | -3.53 | 0.02  |
|               | ZnO <sub>6</sub> (3) | 2.85 D    | 0.16              | 2.59  | -1.17 |
|               | ZnO <sub>6</sub> (4) | 3.62 D    | -0.82             | -3.53 | -0.02 |
|               | Net                  | 1.87 D    | 0                 | -1.87 | 0     |

**Fig. S13** Net moments and dipole moments of ZnO<sub>6</sub> polyhedra in a unit cell

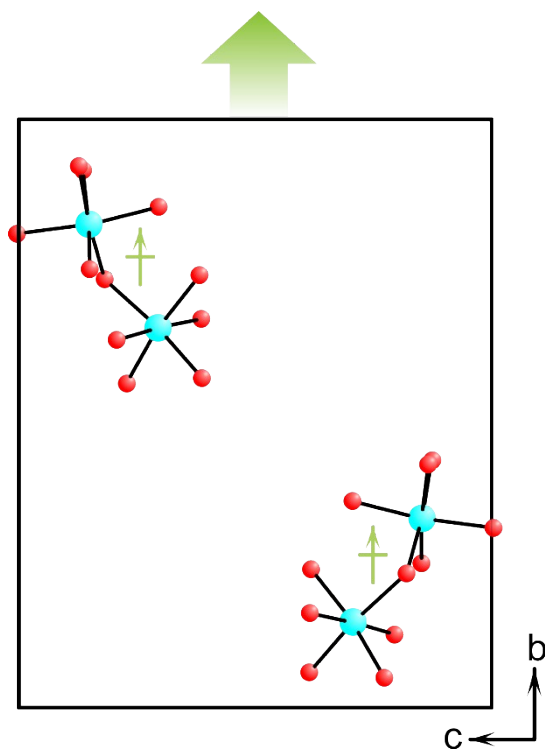



**Fig. S14** PXRD patterns revealing the stability of (*R*)-Zn (a) in various solvents and (b) at various pH values.

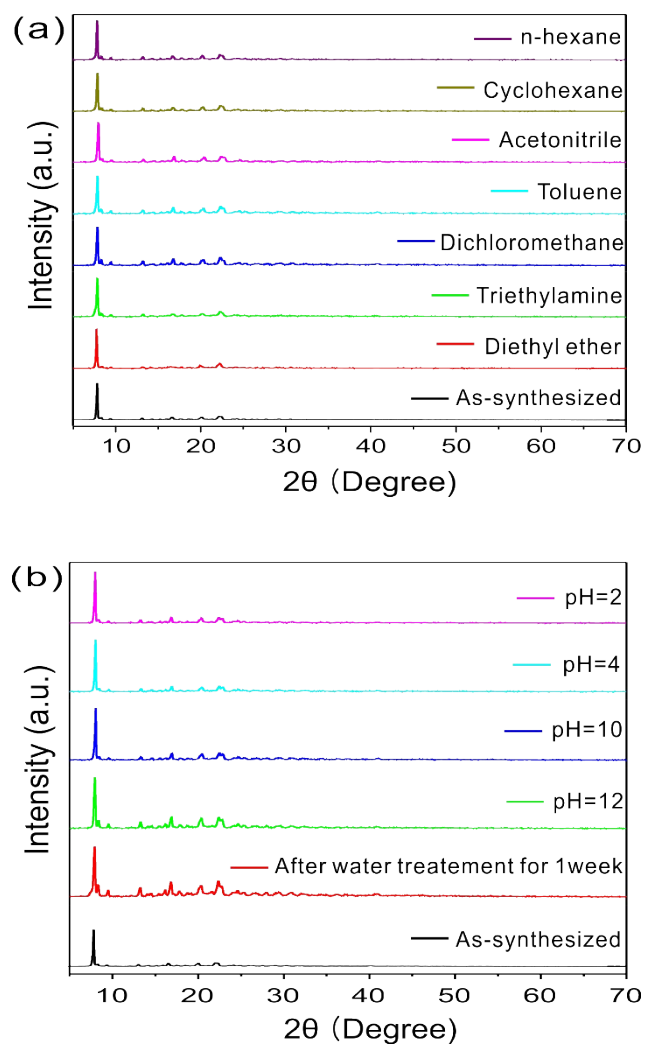

**Table S7** Crystallographic Data for (S)-Zn-EtOH

| (S)-Zn-EtOH                                |            |
|--------------------------------------------|------------|
| fw                                         | 1178.72    |
| space group                                | $P2_1$     |
| $a$ (Å)                                    | 12.177(2)  |
| $b$ (Å)                                    | 16.612(3)  |
| $c$ (Å)                                    | 14.691(3)  |
| $\beta$ (°)                                | 114.36(3)  |
| $V$ (Å <sup>3</sup> )                      | 2707.2(11) |
| $Z$                                        | 2          |
| $T$ (K)                                    | 100(2)     |
| $\lambda$ (Å)                              | 0.630      |
| $\rho_{\text{calcd}}$ (g/cm <sup>3</sup> ) | 1.446      |
| $R(F_o)^a$                                 | 0.0532     |
| $R_w(F_o^2)^b$                             | 0.0911     |
| Flack $x$                                  | 0.023(9)   |

<sup>a</sup> $R(F) = \sum ||F_o| - |F_c|| / \sum |F_o|$ . <sup>b</sup> $R_w(F_o^2) = [\sum w(F_o^2 - F_c^2)^2 / \sum w(F_o^2)^2]^{1/2}$ .

**Table S8** Selected bond distances (Å) and selected bond angles (°) for (S)-Zn-EtOH

| Selected bond distances (Å)                                                                        |            |                       |            |                   |           |             |           |
|----------------------------------------------------------------------------------------------------|------------|-----------------------|------------|-------------------|-----------|-------------|-----------|
| Zn(1)-O(4)                                                                                         | 2.030(4)   | O(4)-C(1)             | 1.254(6)   | O(20)-C(49)       | 1.500(18) | C(41)-C(48) | 1.525(8)  |
| Zn(1)-O(17)#1                                                                                      | 2.057(4)   | O(5)-C(1)             | 1.249(7)   | C(1)-C(2)         | 1.547(9)  | C(49)-C(50) | 1.446(11) |
| Zn(1)-O(13)#2                                                                                      | 2.069(4)   | O(6)-C(9)             | 1.232(6)   | C(2)-C(3)         | 1.514(9)  | N(1)-C(9)   | 1.330(7)  |
| Zn(1)-O(1)                                                                                         | 2.132(5)   | O(7)-C(16)            | 1.231(7)   | C(9)-C(10)        | 1.516(8)  | N(1)-C(2)   | 1.466(7)  |
| Zn(1)-O(3)                                                                                         | 2.135(4)   | O(8)-C(24)            | 1.258(7)   | C(13)-C(16)       | 1.495(8)  | N(2)-C(16)  | 1.337(7)  |
| Zn(1)-O(2)                                                                                         | 2.157(5)   | O(9)-C(24)            | 1.247(6)   | C(17)-C(18)       | 1.533(9)  | N(2)-C(17)  | 1.472(7)  |
| Zn(2)-O(12)#3                                                                                      | 2.029(4)   | O(12)-C(48)           | 1.270(7)   | C(17)-C(24)       | 1.529(8)  | N(3)-C(33)  | 1.345(7)  |
| Zn(2)-O(16)                                                                                        | 2.052(4)   | O(13)-C(48)           | 1.244(7)   | C(25)-C(26)       | 1.578(8)  | N(3)-C(26)  | 1.458(7)  |
| Zn(2)-O(9)                                                                                         | 2.060(4)   | O(14)-C(33)           | 1.235(8)   | C(26)-C(27)       | 1.44(4)   | N(4)-C(40)  | 1.324(7)  |
| Zn(2)-O(10)                                                                                        | 2.073(4)   | O(15)-C(40)           | 1.233(7)   | C(33)-C(34)       | 1.498(8)  | N(4)-C(41)  | 1.458(7)  |
| Zn(2)-O(2)#4                                                                                       | 2.181(4)   | O(16)-C(25)           | 1.261(7)   | C(37)-C(40)       | 1.501(8)  |             |           |
| Zn(2)-O(11)                                                                                        | 2.231(5)   | O(17)-C(25)           | 1.256(7)   | C(41)-C(42)       | 1.532(9)  |             |           |
| Selected bond angles (°)                                                                           |            |                       |            |                   |           |             |           |
| O(1)-Zn(1)-O(2)                                                                                    | 89.10(19)  | O(16)-Zn(2)-O(11)     | 173.87(17) | O(5)-C(1)-C(2)    | 117.4(5)  |             |           |
| O(1)-Zn(1)-O(3)                                                                                    | 84.37(19)  | O(17)#1-Zn(1)-O(1)    | 91.75(18)  | O(6)-C(9)-C(10)   | 120.3(5)  |             |           |
| O(2)#4-Zn(2)-O(11)                                                                                 | 89.76(18)  | O(17)#1-Zn(1)-O(2)    | 88.95(16)  | O(7)-C(16)-C(13)  | 120.9(5)  |             |           |
| O(3)-Zn(1)-O(2)                                                                                    | 92.63(17)  | O(17)#1-Zn(1)-O(3)    | 175.79(17) | O(8)-C(24)-C(17)  | 116.6(5)  |             |           |
| O(4)-Zn(1)-O(1)                                                                                    | 85.10(19)  | O(17)#1-Zn(1)-O(13)#2 | 96.90(17)  | O(9)-C(24)-C(17)  | 116.2(5)  |             |           |
| O(4)-Zn(1)-O(2)                                                                                    | 172.29(17) | Zn(1)-O(2)-Zn(2)#2    | 111.6(2)   | O(12)-C(48)-C(41) | 115.4(5)  |             |           |
| O(4)-Zn(1)-O(3)                                                                                    | 91.97(17)  | C(1)-O(4)-Zn(1)       | 130.2(4)   | O(13)-C(48)-C(41) | 118.2(5)  |             |           |
| O(4)-Zn(1)-O(13)#2                                                                                 | 91.74(15)  | C(24)-O(9)-Zn(2)      | 128.1(4)   | O(14)-C(33)-C(34) | 121.4(5)  |             |           |
| O(4)-Zn(1)-O(17)#1                                                                                 | 86.05(16)  | C(25)-O(16)-Zn(2)     | 134.5(4)   | O(16)-C(25)-C(26) | 116.6(5)  |             |           |
| O(9)-Zn(2)-O(2)#4                                                                                  | 172.51(16) | C(25)-O(17)-Zn(1)#4   | 133.0(4)   | O(17)-C(25)-C(26) | 117.5(6)  |             |           |
| O(9)-Zn(2)-O(10)                                                                                   | 92.12(17)  | C(48)-O(12)-Zn(2)#5   | 132.8(4)   | O(20)-C(49)-C(50) | 111.2(11) |             |           |
| O(9)-Zn(2)-O(11)                                                                                   | 84.03(18)  | C(48)-O(13)-Zn(1)#6   | 133.2(4)   | N(1)-C(2)-C(3)    | 113.6(5)  |             |           |
| O(10)-Zn(2)-O(2)#4                                                                                 | 91.47(17)  | O(5)-C(1)-O(4)        | 130.2(4)   | N(1)-C(2)-C(1)    | 109.9(5)  |             |           |
| O(10)-Zn(2)-O(11)                                                                                  | 84.81(18)  | O(8)-C(24)-O(9)       | 127.2(6)   | N(1)-C(9)-C(10)   | 116.9(5)  |             |           |
| O(12)#3-Zn(2)-O(2)#4                                                                               | 87.76(16)  | O(13)-C(48)-O(12)     | 126.5(5)   | N(2)-C(16)-C(13)  | 117.9(5)  |             |           |
| O(12)#3-Zn(2)-O(9)                                                                                 | 87.65(16)  | O(17)-C(25)-O(16)     | 125.9(6)   | N(2)-C(17)-C(18)  | 112.8(5)  |             |           |
| O(12)#3-Zn(2)-O(10)                                                                                | 170.86(18) | O(6)-C(9)-N(1)        | 122.7(5)   | N(2)-C(17)-C(24)  | 109.6(5)  |             |           |
| O(12)#3-Zn(2)-O(11)                                                                                | 86.08(17)  | O(7)-C(16)-N(2)       | 121.2(5)   | N(3)-C(26)-C(27)  | 111.4(17) |             |           |
| O(12)-Zn(2)-O(16)#3                                                                                | 98.36(17)  | O(14)-C(33)-N(3)      | 121.5(5)   | N(3)-C(26)-C(25)  | 108.3(5)  |             |           |
| O(13)#2-Zn(1)-O(1)                                                                                 | 170.58(18) | O(15)-C(40)-N(4)      | 121.6(5)   | N(3)-C(33)-C(34)  | 117.2(6)  |             |           |
| O(13)#2-Zn(1)-O(2)                                                                                 | 94.69(17)  | C(9)-N(1)-C(2)        | 121.3(5)   | N(4)-C(40)-C(37)  | 117.6(5)  |             |           |
| O(13)#2-Zn(1)-O(3)                                                                                 | 86.87(17)  | C(16)-N(2)-C(17)      | 120.0(5)   | N(4)-C(41)-C(42)  | 112.6(5)  |             |           |
| O(16)-Zn(2)-O(2)#4                                                                                 | 94.61(17)  | C(33)-N(3)-C(26)      | 123.1(5)   | N(4)-C(41)-C(48)  | 109.9(5)  |             |           |
| O(16)-Zn(2)-O(9)                                                                                   | 91.91(17)  | C(40)-N(4)-C(41)      | 121.2(5)   |                   |           |             |           |
| O(16)-Zn(2)-O(10)                                                                                  | 90.78(17)  | O(4)-C(1)-C(2)        | 115.8(5)   |                   |           |             |           |
| Symmetry operation : #1 x-1,y-1,z-1 #2 x,y-1,z #3 x-1,y,z-1 #4 x,y+1,z #5 x+1,y,z+1 #6 x+1,y+1,z+1 |            |                       |            |                   |           |             |           |

**Table S9** Hydrogen bonds distances (Å) for (S)-Zn-EtOH

| D-H...A               | d(D...A) | D-H...A                | d(D...A) |
|-----------------------|----------|------------------------|----------|
| N(1)-H(1)...O(18)#1   | 2.974(6) | O(18)-H(1D)...O(8)#8   | 2.857(6) |
| O(1)-H(10)...O(15)#7  | 2.717(6) | O(18)-H(1E)...O(17)    | 2.835(6) |
| O(1)-H(13)...O(3)     | 2.865(6) | O(18)-H(1E)...O(4)#4   | 3.000(6) |
| O(2)-H(9)...O(21)     | 2.566(7) | O(19)-H(1H)...O(12)    | 2.751(6) |
| O(3)-H(16)...O(5)     | 2.714(4) | O(19)-H(1F)...O(5)#8   | 2.839(6) |
| O(3)-H(1G)...O(6)#9   | 2.809(6) | O(21)-H(1B)...O(6)#9   | 2.744(7) |
| O(10)-H(1L)...O(7)#8  | 2.732(6) | C(50)-H(50A)...O(14)#7 | 2.779(8) |
| O(10)-H(1M)...O(8)    | 2.635(6) | O(50)-H(50B)...O(11)   | 2.755(8) |
| O(11)-H(1N)...O(19)#3 | 2.825(8) |                        |          |

Symmetry operation : #1 x-1,y-1,z-1 #3 x,y,z-1 #4 x,y-1,z #7 -x,y+1/2,-z  
#7 -x+1,y+1/2,-z+1 #8 -x+1,y+1/2,-z+1 #9 -x,y-1/2,-z

**Fig. S15** Experimental and calculated powder X-ray diffraction patterns of (S)-Zn-EtOH

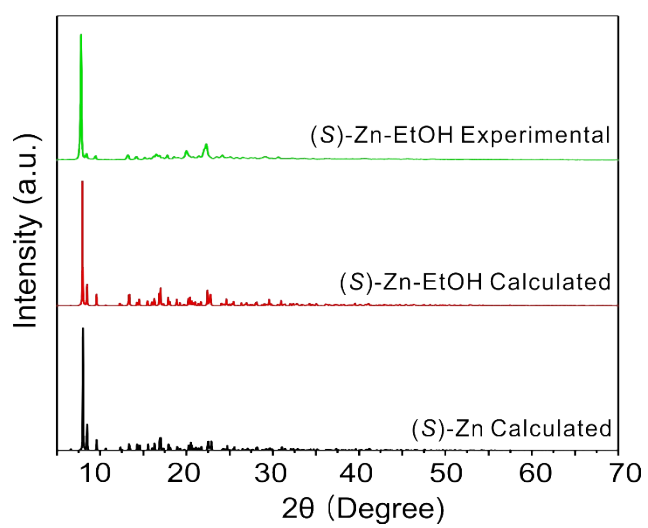

Fig. S16 GC-MS result of distilled diethyl ether

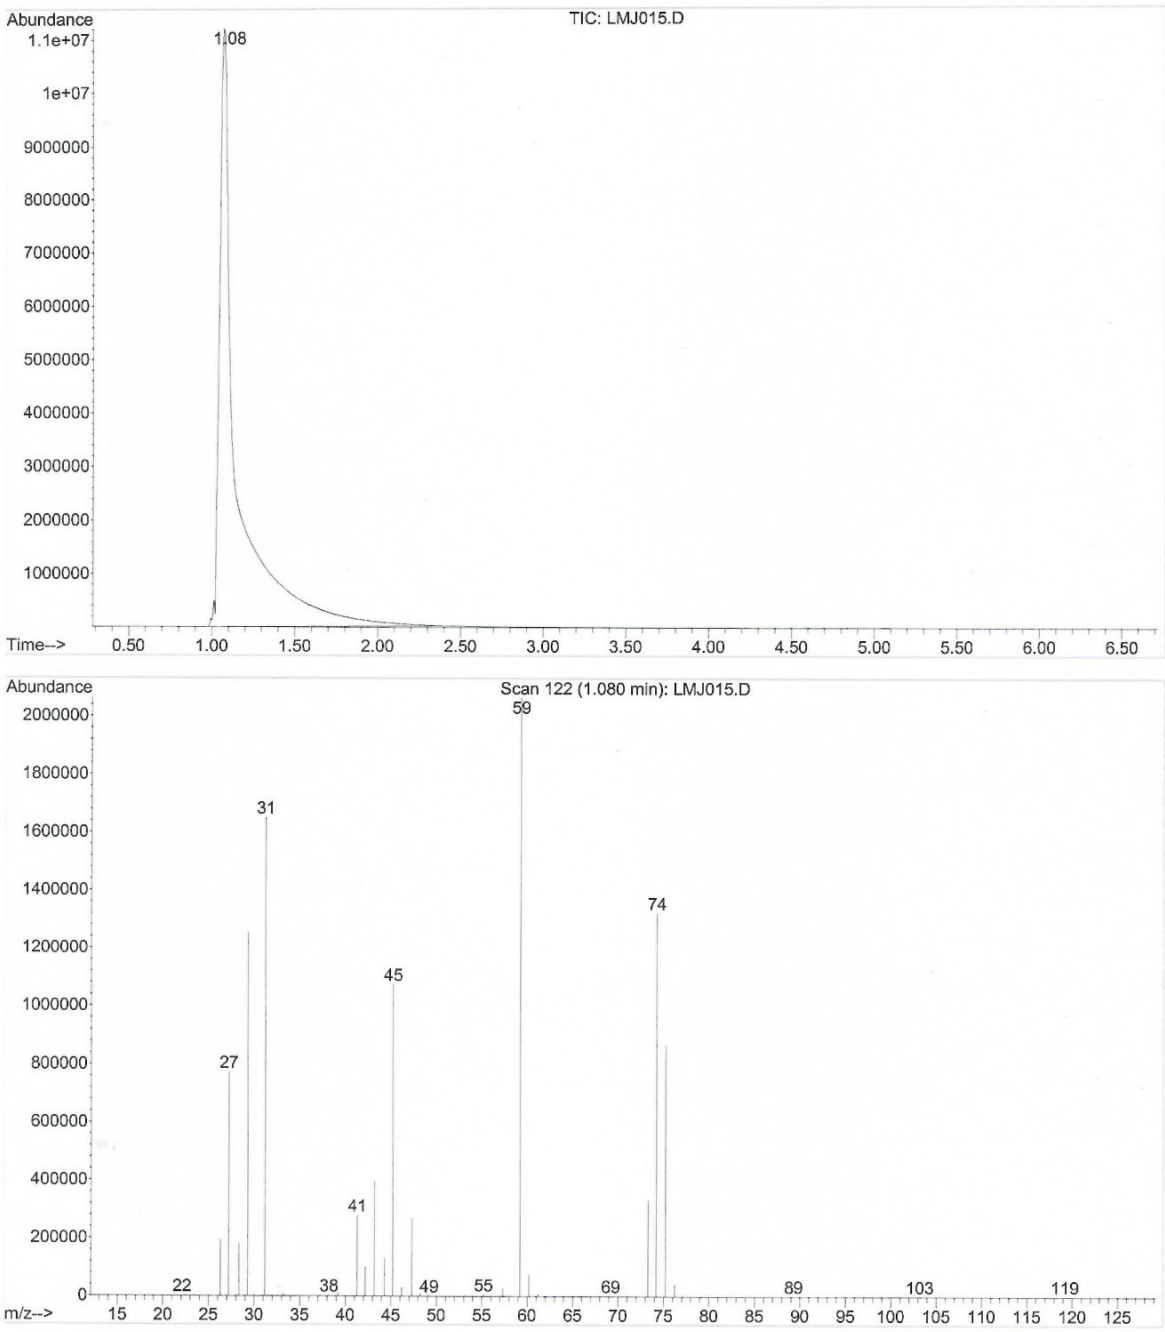

Area Percent Report

Data File : C:\MSDCHEM\1\DATA\LMJ015.D Vial: 1  
Acq On : 14 Dec 2021 11:03 Operator: LHK  
Sample : LMJ D Ether Inst : Instrumen  
Misc : 60/10/10/240 Multiplr: 1.00  
Sample Amount: 0.00

MS Integration Params: autoint1.e

Method : C:\MSDCHEM\1\METHODS\DEFAULT.M (Chemstation Integrator)  
Title :

Signal : TIC

| peak # | R.T. min | first scan | max scan | last scan | PK TY | peak height | corr. area | corr. % max. | % of total |
|--------|----------|------------|----------|-----------|-------|-------------|------------|--------------|------------|
| 1      | 1.080    | 105        | 122      | 330       | BB 6  | 11191739    | 804600884  | 100.00%      | 100.000%   |

Sum of corrected areas: 804600884

**Fig. S17** GC-MS result of distilled diethyl ether containing (S)-Zn crystal for 1 day

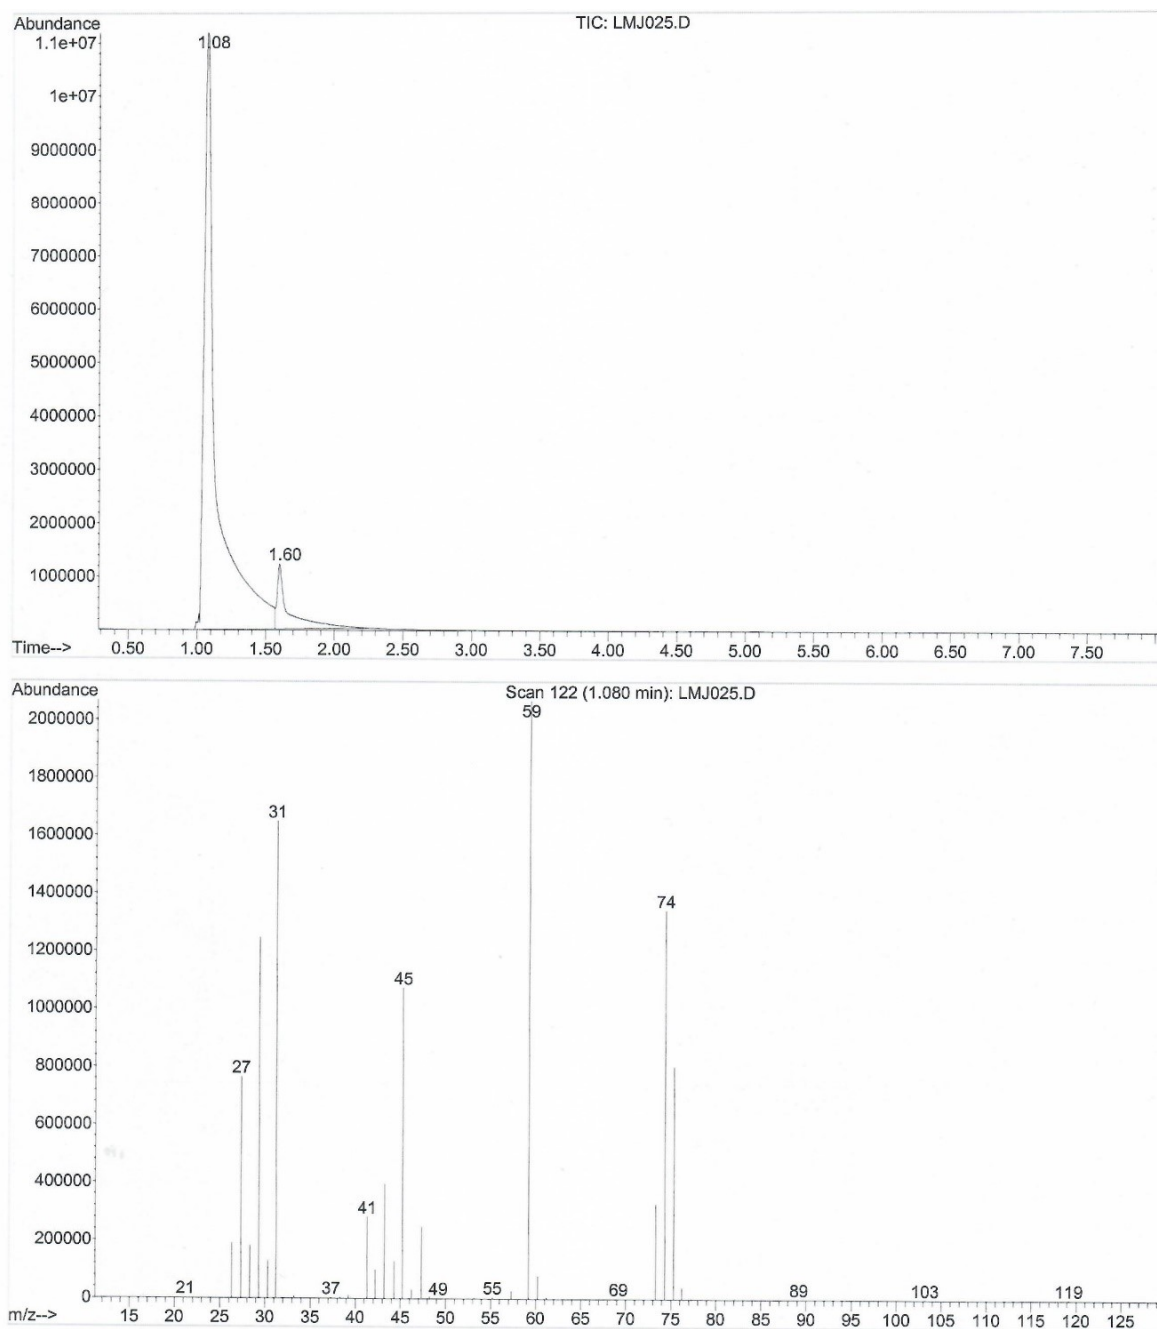



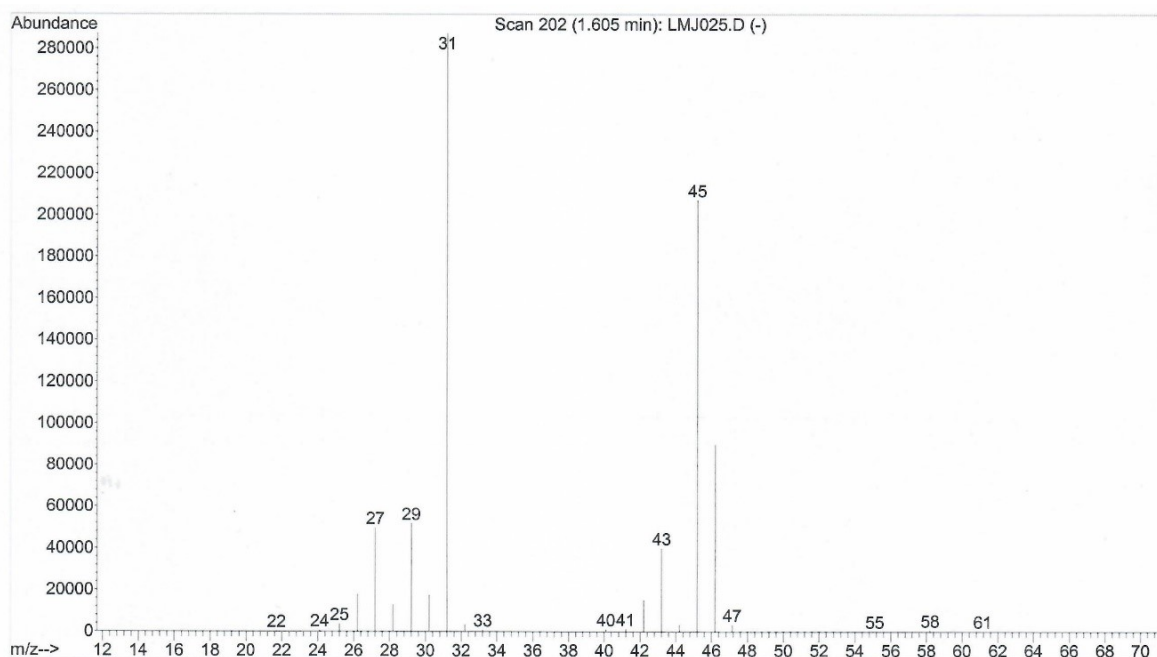

Area Percent Report

Data File : C:\MSDCHEM\1\DATA\LMJ025.D  
 Acq On : 28 Dec 2021 14:26  
 Sample : LMJ D\_ether\_1d  
 Misc : 60/10/10/240

Vial: 1  
 Operator: LHK  
 Inst : Instrumen  
 Multiplr: 1.00  
 Sample Amount: 0.00

MS Integration Params: autoint1.e

Method : C:\MSDCHEM\1\METHODS\DEFAULT.M (Chemstation Integrator)  
 Title :

Signal : TIC

| peak # | R.T. min | first scan | max scan | last scan | PK TY | peak height | corr. area | corr. % max. | % of total |
|--------|----------|------------|----------|-----------|-------|-------------|------------|--------------|------------|
| 1      | 1.080    | 105        | 122      | 196       | BV 5  | 11189299    | 695965201  | 100.00%      | 90.552%    |
| 2      | 1.605    | 196        | 202      | 305       | VB    | 1211433     | 72614507   | 10.43%       | 9.448%     |

Sum of corrected areas: 768579707

**Fig. S18** GC-MS result of distilled diethyl ether containing (S)-Zn crystal for 3 days

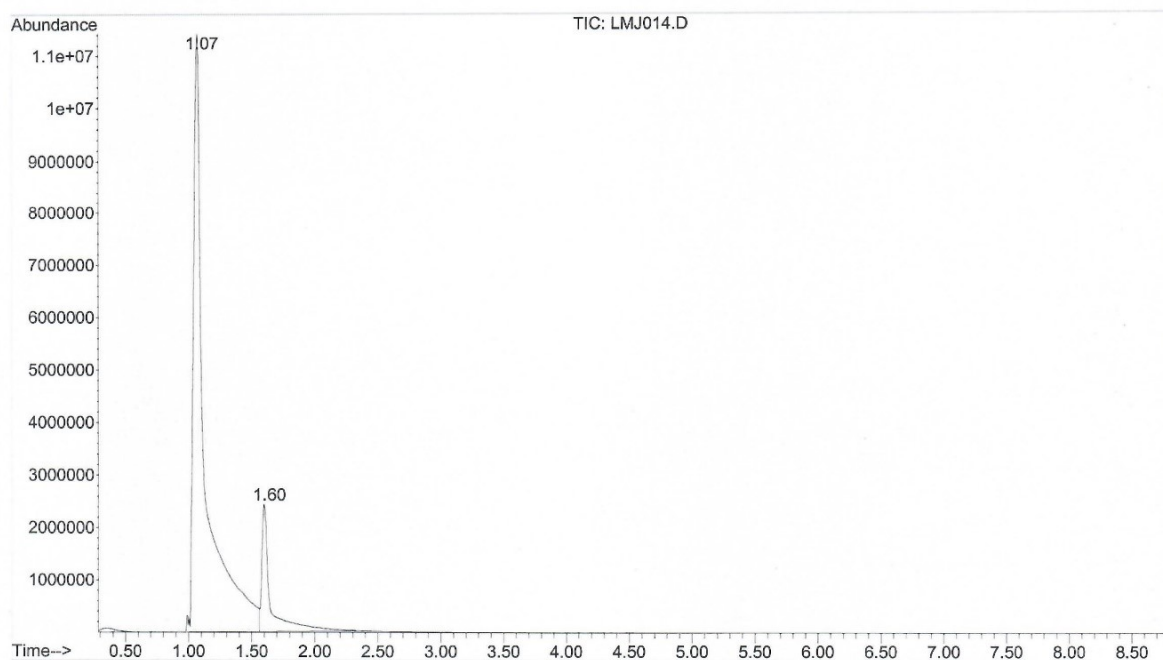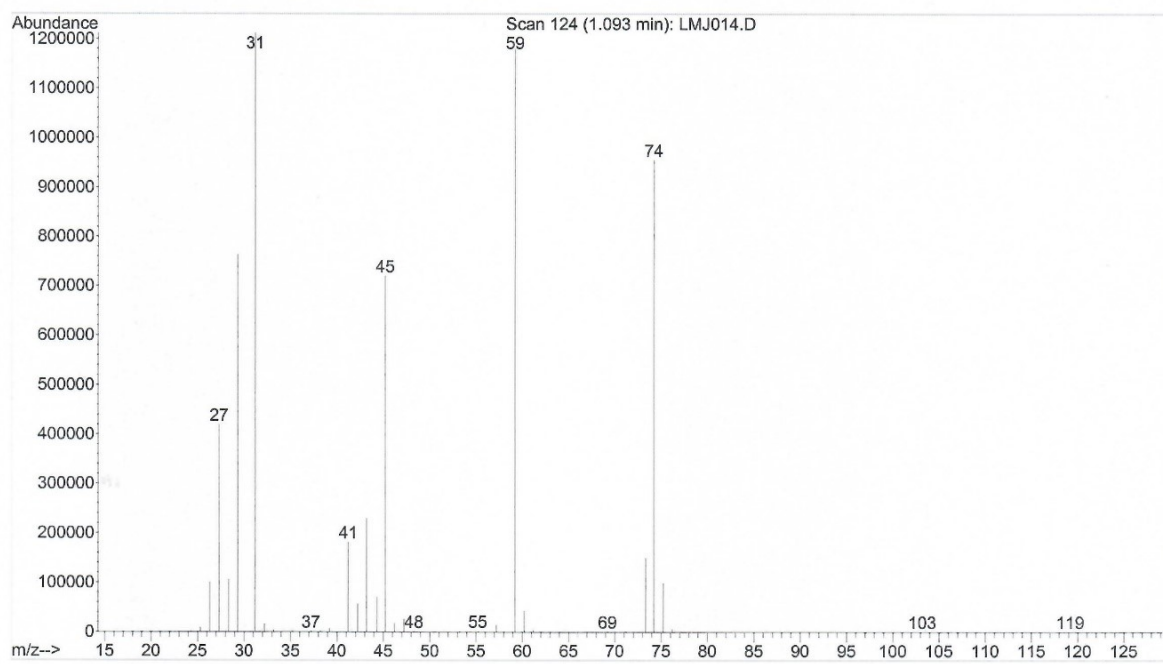

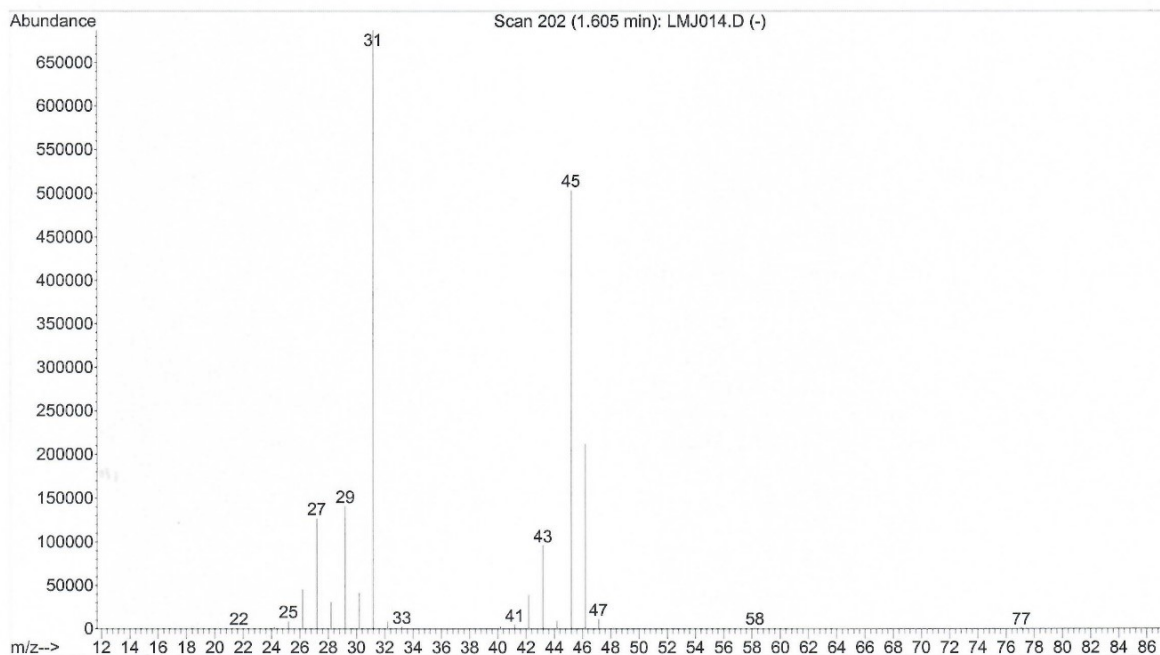

Area Percent Report

Data File : C:\MSDCHEM\1\DATA\LMJ014.D  
 Acq On : 14 Dec 2021 10:44  
 Sample : LMJ D Ether 3d  
 Misc : 60/10/10/240

Vial: 1  
 Operator: LHK  
 Inst : Instrumen  
 Multiplr: 1.00  
 Sample Amount: 0.00

MS Integration Params: autoint1.e

Method : C:\MSDCHEM\1\METHODS\DEFAULT.M (Chemstation Integrator)  
 Title :

Signal : TIC

| peak # | R.T. min | first scan | max scan | last scan | PK TY | peak height | corr. area | corr. % max. | % of total |
|--------|----------|------------|----------|-----------|-------|-------------|------------|--------------|------------|
| 1      | 1.073    | 94         | 121      | 195       | BV 5  | 11343887    | 736637667  | 100.00%      | 86.393%    |
| 2      | 1.605    | 195        | 202      | 318       | VB    | 2413252     | 116019525  | 15.75%       | 13.607%    |

Sum of corrected areas: 852657192

**Fig. S19** GC-MS result of distilled diethyl ether containing (S)-Zn crystal for 7 days

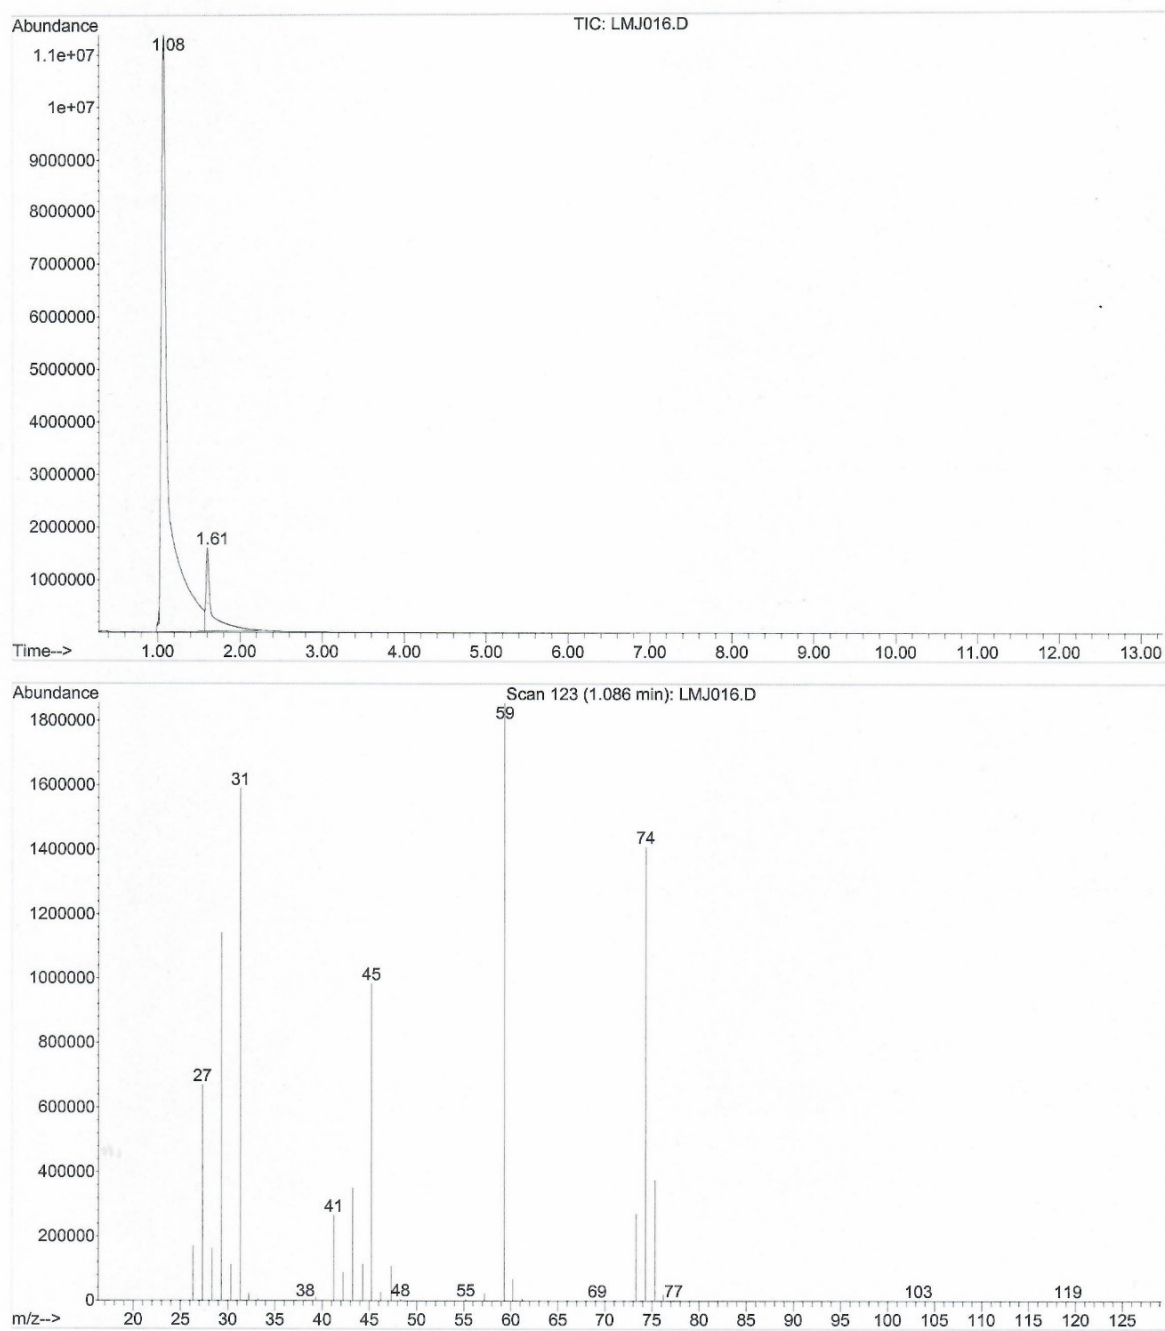

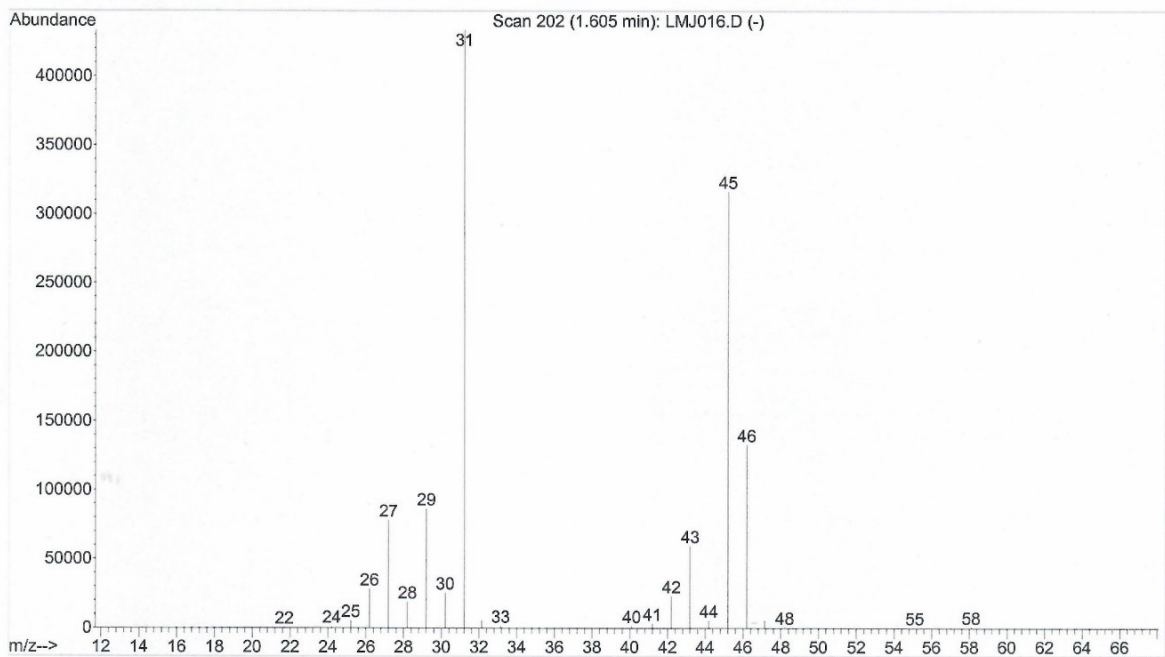

Area Percent Report

Data File : C:\MSDCHEM\1\DATA\LMJ016.D  
 Acq On : 17 Dec 2021 10:28  
 Sample : LMJ D\_ether\_7d  
 Misc : 60/10/10/240

Vial: 1  
 Operator: LHK  
 Inst : Instrumen  
 Multiplr: 1.00  
 Sample Amount: 0.00

MS Integration Params: autoint1.e

Method : C:\MSDCHEM\1\METHODS\DEFAULT.M (Chemstation Integrator)  
 Title :

Signal : TIC

| peak # | R.T. min | first scan | max scan | last scan | PK TY | peak height | corr. area | corr. % max. | % of total |
|--------|----------|------------|----------|-----------|-------|-------------|------------|--------------|------------|
| 1      | 1.073    | 95         | 121      | 196       | BV 5  | 11372559    | 705957412  | 100.00%      | 89.595%    |
| 2      | 1.605    | 196        | 202      | 309       | VB    | 1568131     | 81984419   | 11.61%       | 10.405%    |

Sum of corrected areas: 787941831

**Fig. S20** GC-MS result of distilled diethyl ether containing (S)-Zn crystal for 10 days

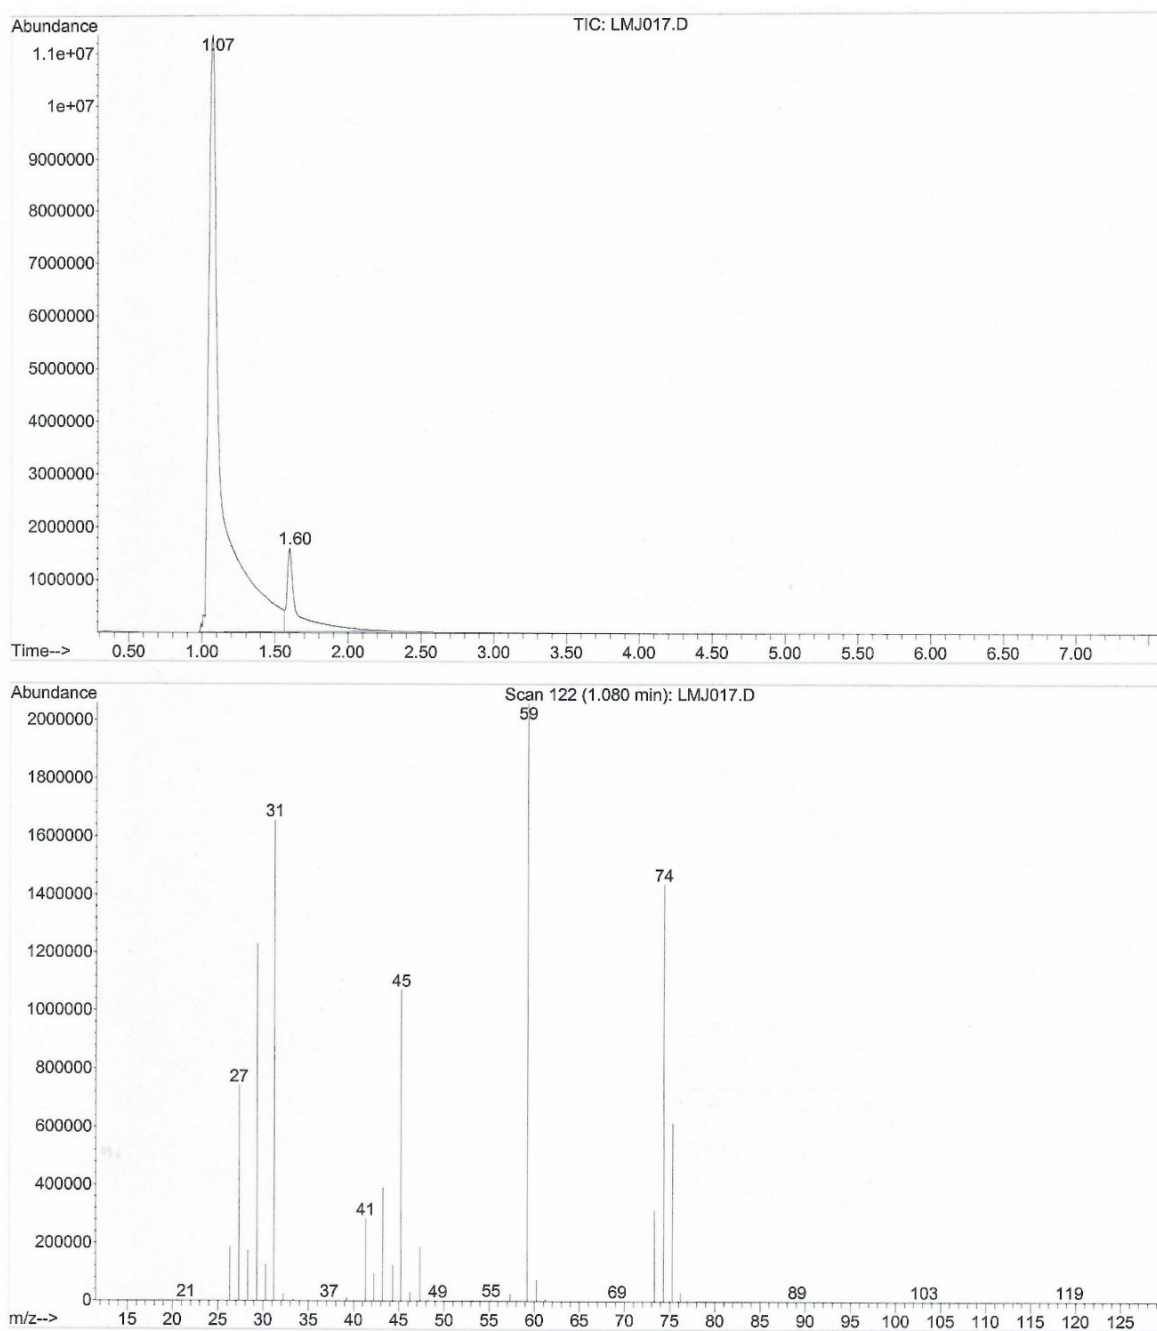



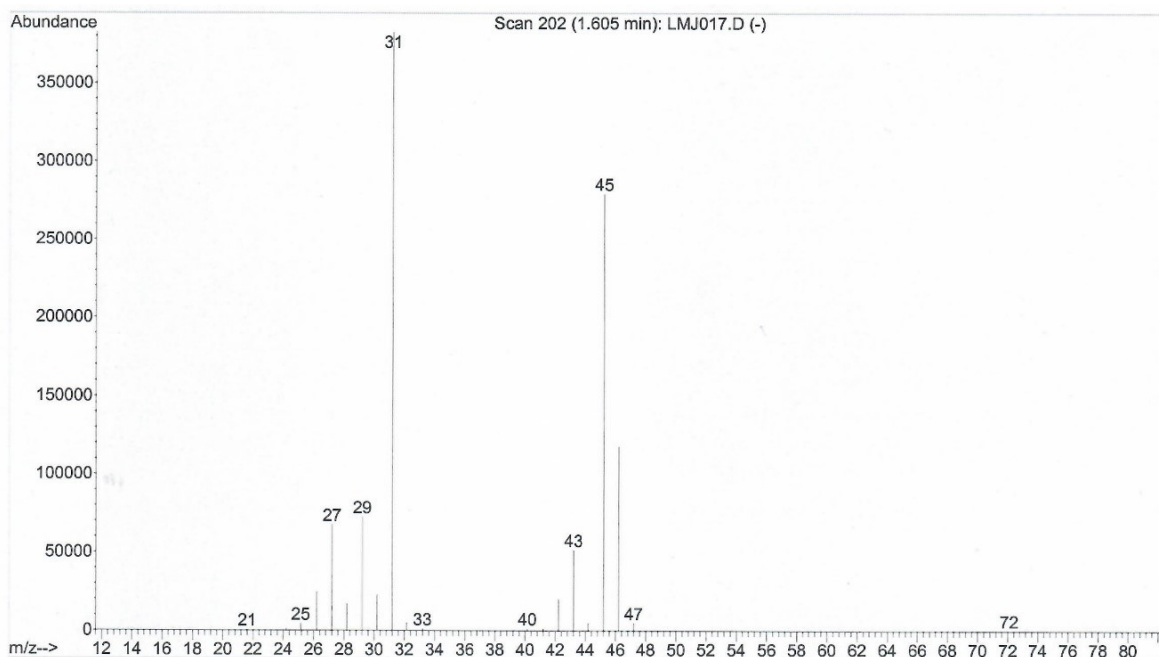

Area Percent Report

Data File : C:\MSDCHEM\1\DATA\LMJ017.D  
 Acq On : 20 Dec 2021 11:02  
 Sample : LMJ D\_ether\_10d  
 Misc : 60/10/10/240

Vial: 1  
 Operator: LHK  
 Inst : Instrumen  
 Multiplr: 1.00  
 Sample Amount: 0.00

MS Integration Params: autoint1.e

Method : C:\MSDCHEM\1\METHODS\DEFAULT.M (Chemstation Integrator)  
 Title :

Signal : TIC

| peak # | R.T. min | first scan | max scan | last scan | PK TY | peak height | corr. area | corr. % max. | % of total |
|--------|----------|------------|----------|-----------|-------|-------------|------------|--------------|------------|
| 1      | 1.073    | 95         | 121      | 196       | BV 4  | 11295725    | 702351997  | 100.00%      | 89.354%    |
| 2      | 1.599    | 196        | 201      | 310       | VB    | 1558770     | 83683504   | 11.91%       | 10.646%    |

Sum of corrected areas: 786035501

**Fig. S21** GC-MS result of distilled diethyl ether containing (S)-Zn crystal for 14 days

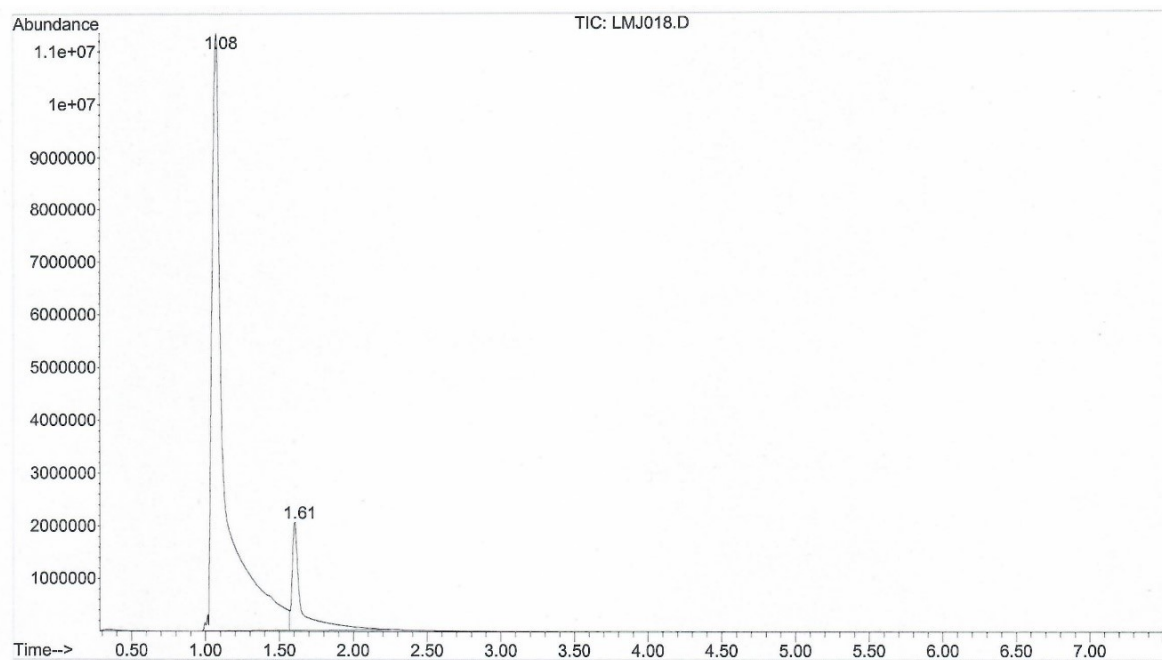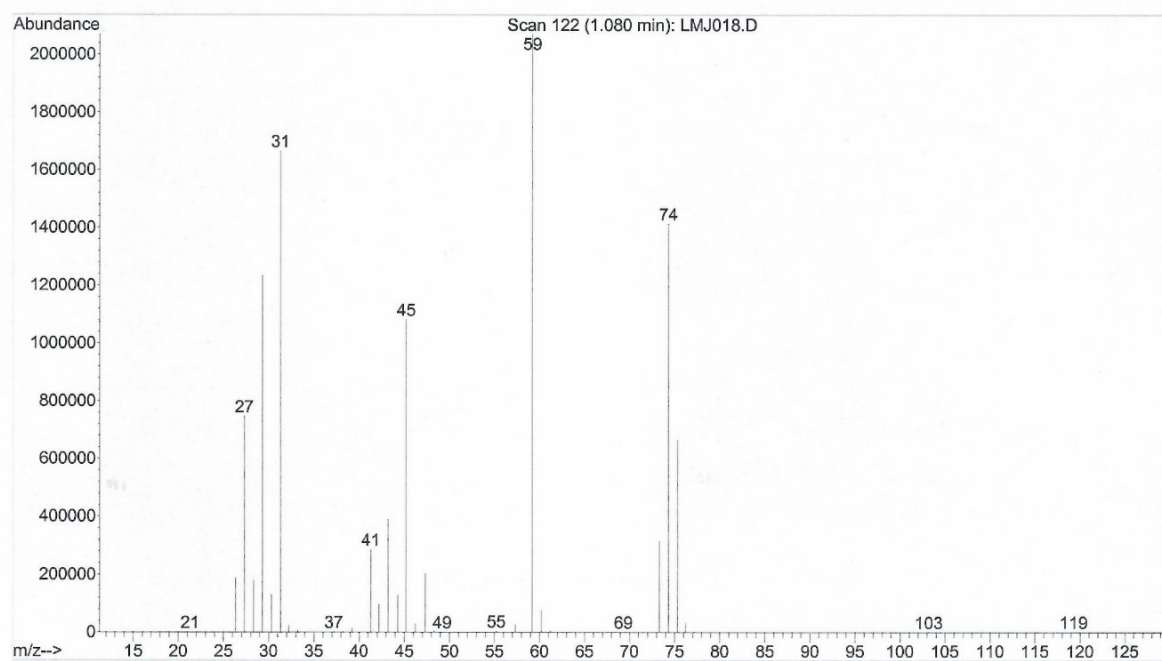



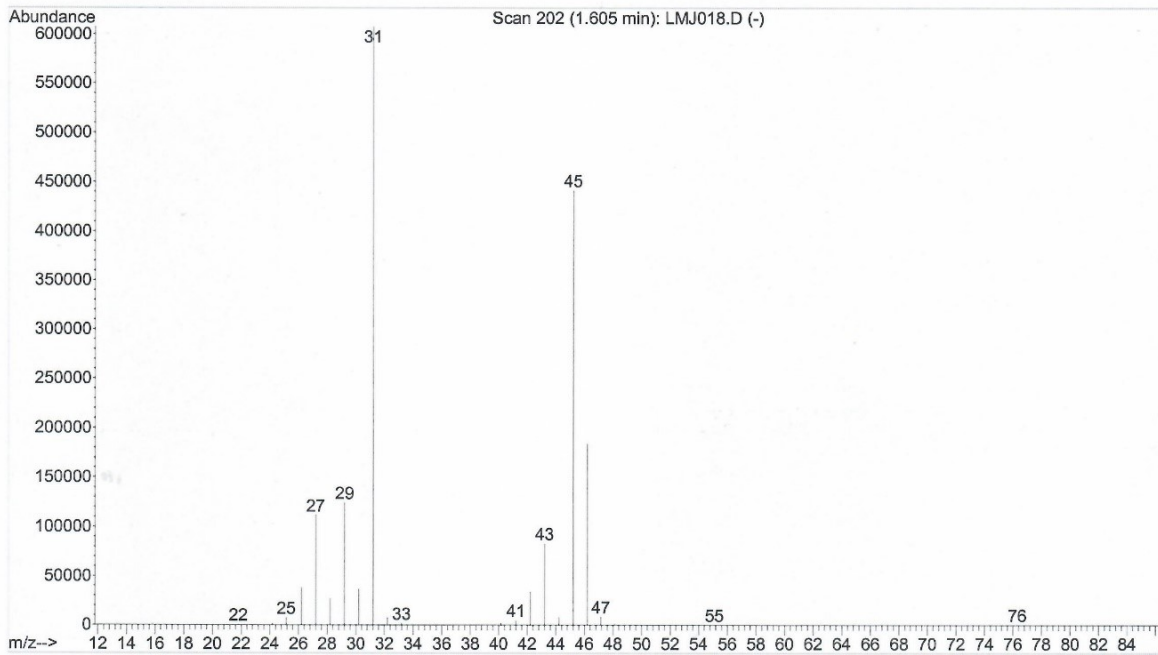

Area Percent Report

Data File : C:\MSDCHEM\1\DATA\LMJ018.D  
 Acq On : 24 Dec 2021 13:59  
 Sample : LMJ D\_ether\_14d  
 Misc : 60/10/10/240

Vial: 1  
 Operator: LHK  
 Inst : Instrumen  
 Multiplr: 1.00  
 Sample Amount: 0.00

MS Integration Params: autoint1.e

Method : C:\MSDCHEM\1\METHODS\DEFAULT.M (Chemstation Integrator)  
 Title :

Signal : TIC

| peak # | R.T. min | first scan | max scan | last scan | PK TY | peak height | corr. area | corr. % max. | % of total |
|--------|----------|------------|----------|-----------|-------|-------------|------------|--------------|------------|
| 1      | 1.073    | 93         | 121      | 196       | BV 5  | 11331447    | 682183556  | 100.00%      | 88.322%    |
| 2      | 1.605    | 196        | 202      | 305       | VB    | 2046168     | 90196487   | 13.22%       | 11.678%    |

Sum of corrected areas: 772380043

Fig. S22 GC-MS result of distilled diethyl ether containing  $Zn(NO_3)_2$  for 1 day

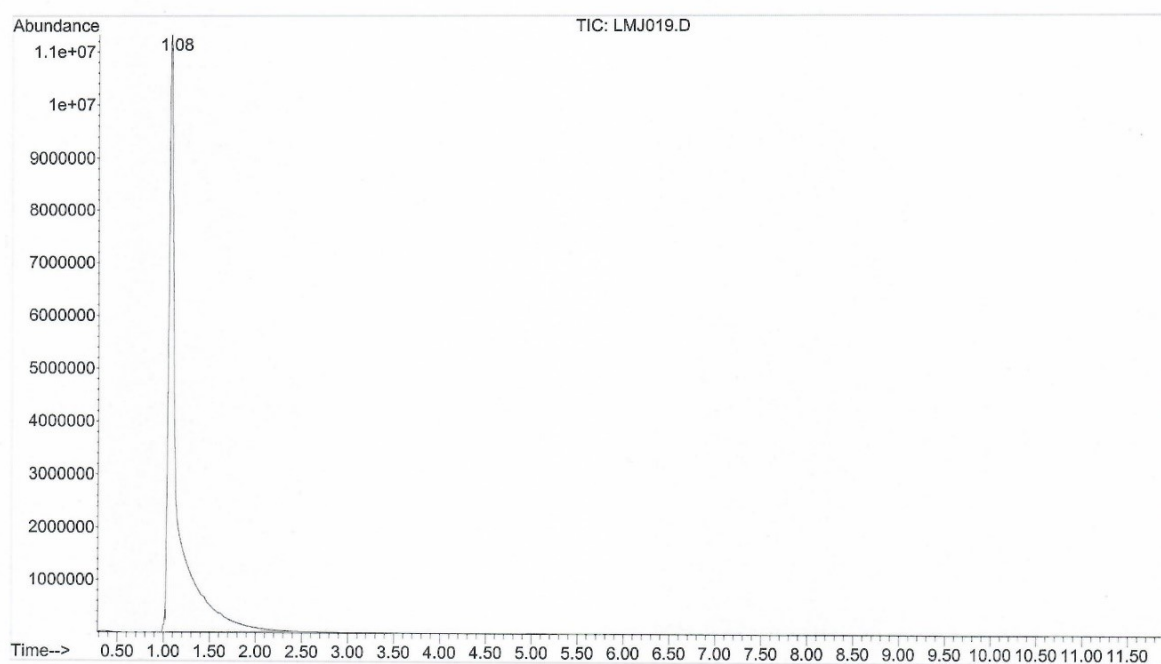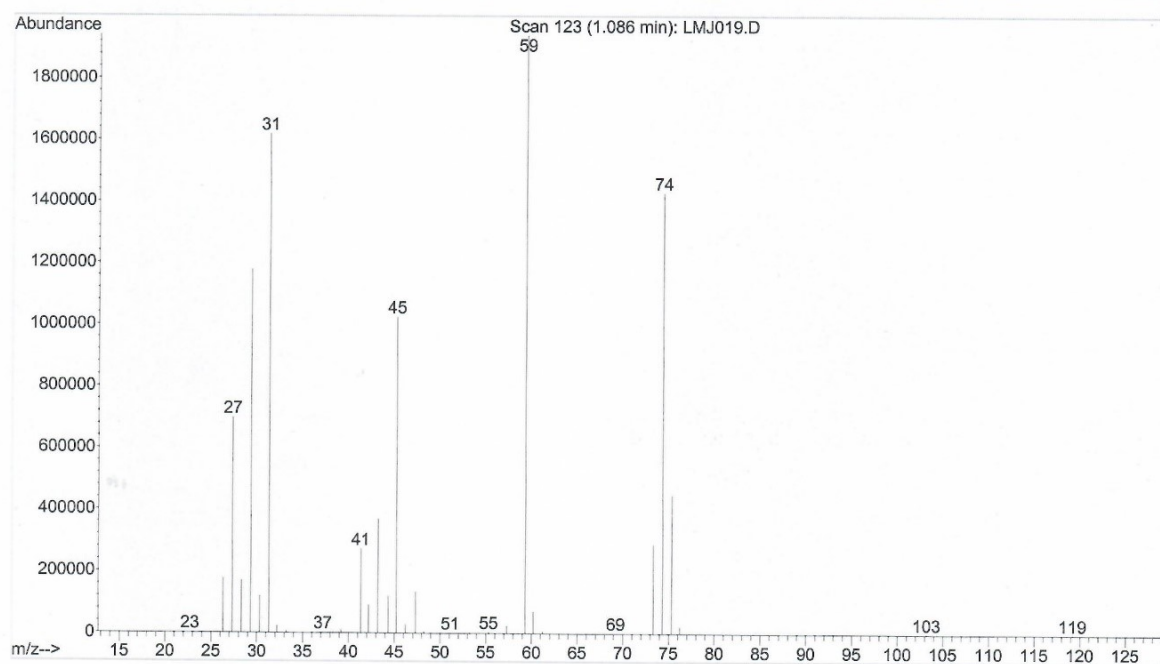

Area Percent Report

Data File : C:\MSDCHEM\1\DATA\LMJ019.D Vial: 1  
Acq On : 27 Dec 2021 13:24 Operator: LHK  
Sample : LMJ D\_ether\_Zn(NO3)2 Inst : Instrumen  
Misc : 60/10/10/240 Multiplr: 1.00  
Sample Amount: 0.00

MS Integration Params: autoint1.e

Method : C:\MSDCHEM\1\METHODS\DEFAULT.M (Chemstation Integrator)  
Title :

Signal : TIC

| peak # | R.T. min | first scan | max scan | last scan | PK TY | peak height | corr. area | corr. % max. | % of total |
|--------|----------|------------|----------|-----------|-------|-------------|------------|--------------|------------|
| 1      | 1.080    | 97         | 122      | 329       | BB 5  | 11328763    | 749202585  | 100.00%      | 100.000%   |

Sum of corrected areas: 749202585

**Fig. S23** GC-MS result of distilled diethyl ether containing TBPG ligand for 1 day

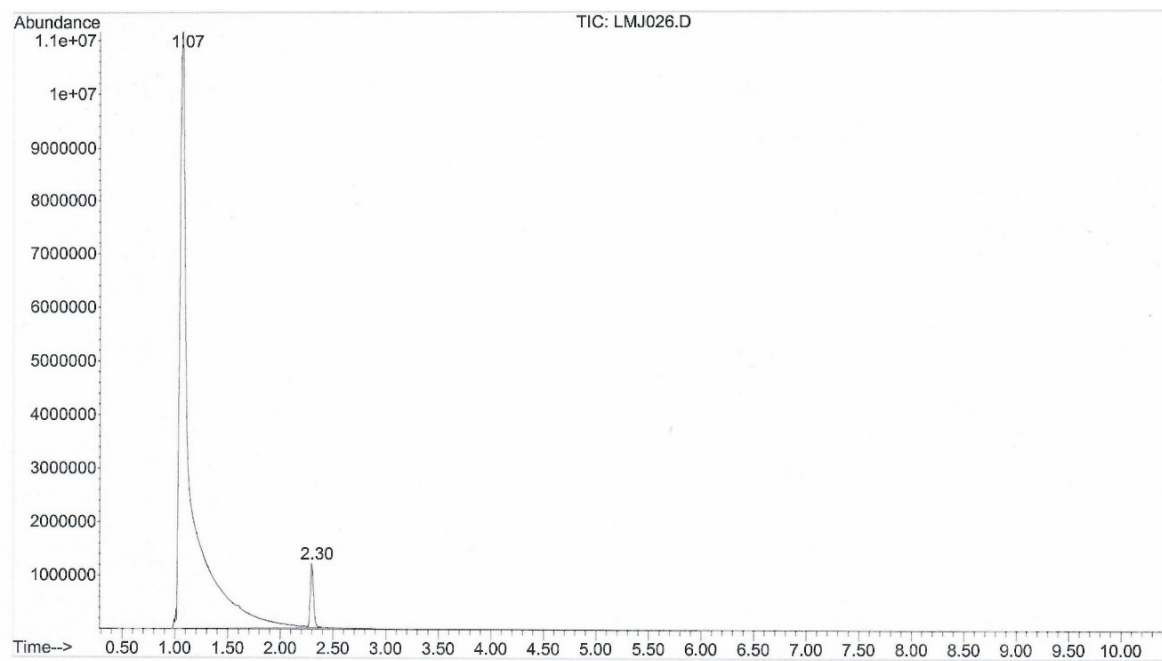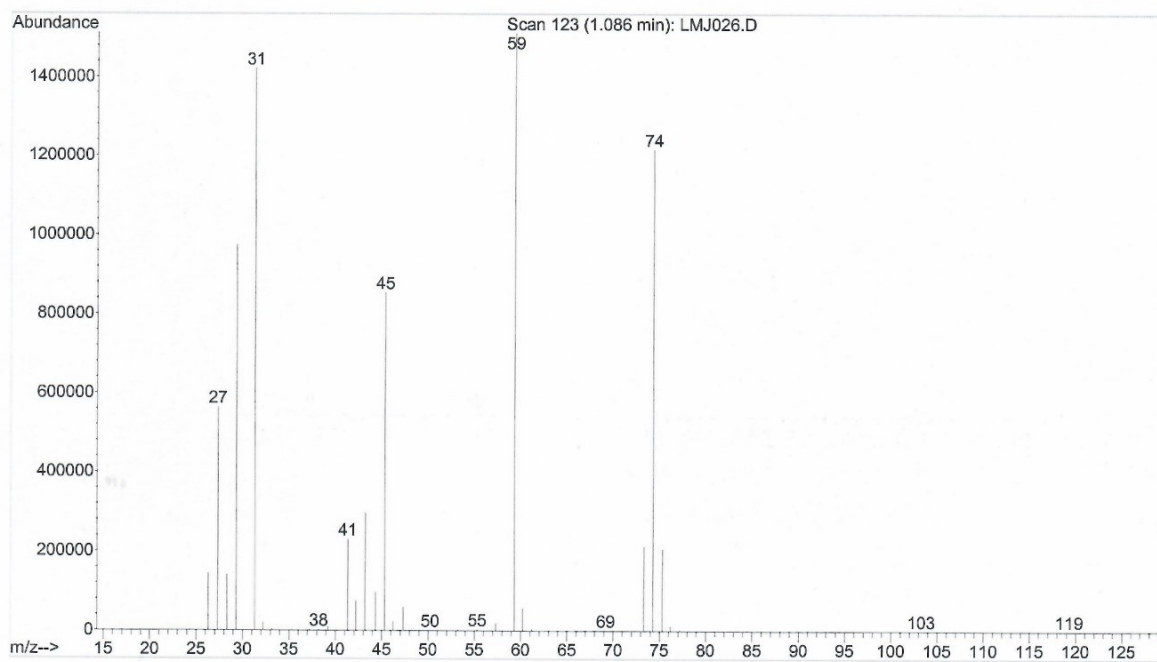

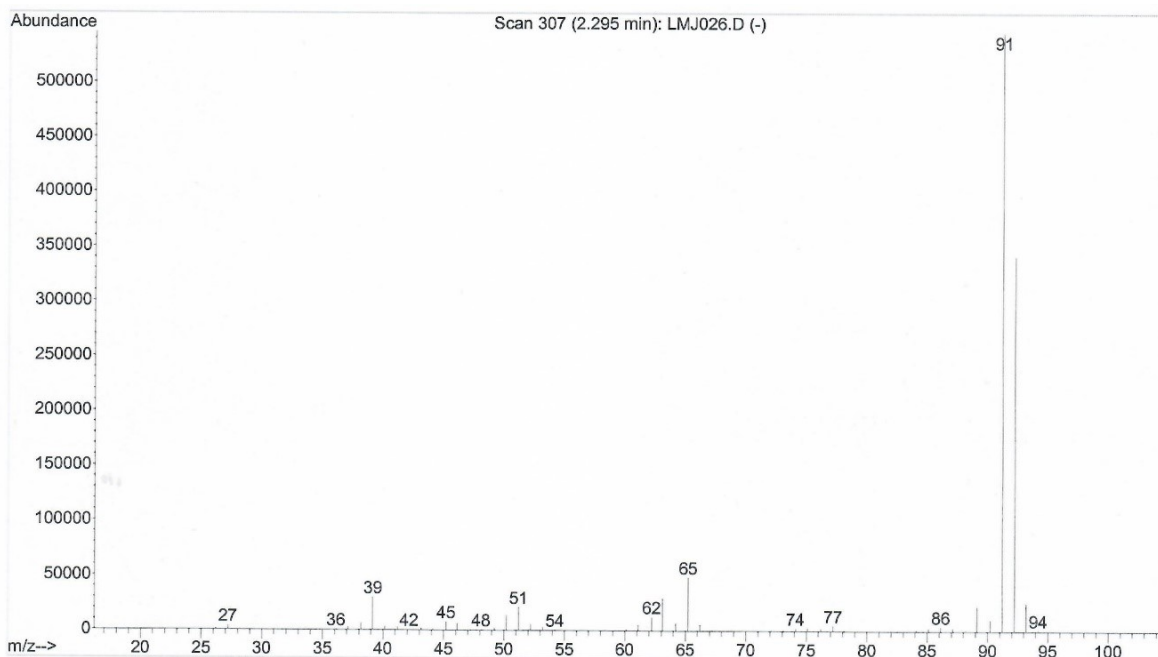

Area Percent Report

Data File : C:\MSDCHEM\1\DATA\LMJ026.D Vial: 1  
 Acq On : 28 Dec 2021 14:52 Operator: LHK  
 Sample : LMJ D\_ether\_ligand Inst : Instrumen  
 Misc : 60/10/10/240 Multiplr: 1.00  
 Sample Amount: 0.00

MS Integration Params: autoint1.e

Method : C:\MSDCHEM\1\METHODS\DEFAULT.M (Chemstation Integrator)  
 Title :

Signal : TIC

| peak # | R.T. min | first scan | max scan | last scan | PK TY | peak height | corr. area | corr. % max. | % of total |
|--------|----------|------------|----------|-----------|-------|-------------|------------|--------------|------------|
| 1      | 1.073    | 104        | 121      | 301       | BV 4  | 11157777    | 797326498  | 100.00%      | 96.891%    |
| 2      | 2.302    | 301        | 308      | 329       | VB    | 1181425     | 25585806   | 3.21%        | 3.109%     |

Sum of corrected areas: 822912304

**Fig. S24** Fluorescence emission spectra of (*R*)-Zn and (*R,R*)-TBPG in the solid state

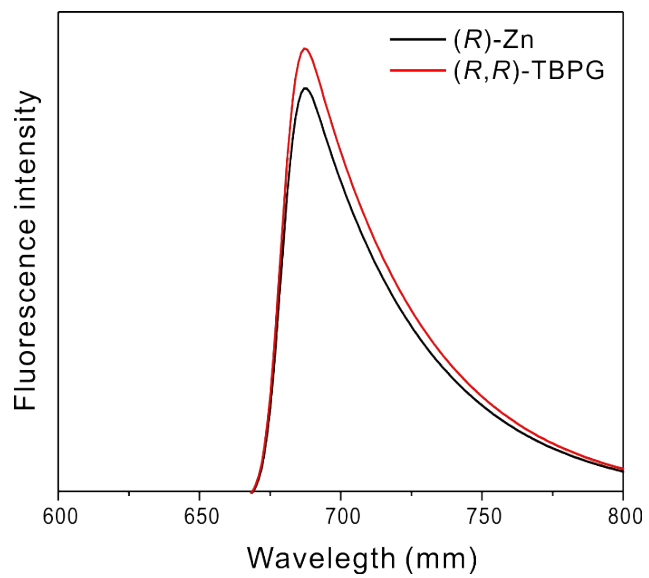

**Fig. S25** PXRD patterns of (*R*)-Zn before and after the fluorescence measurements

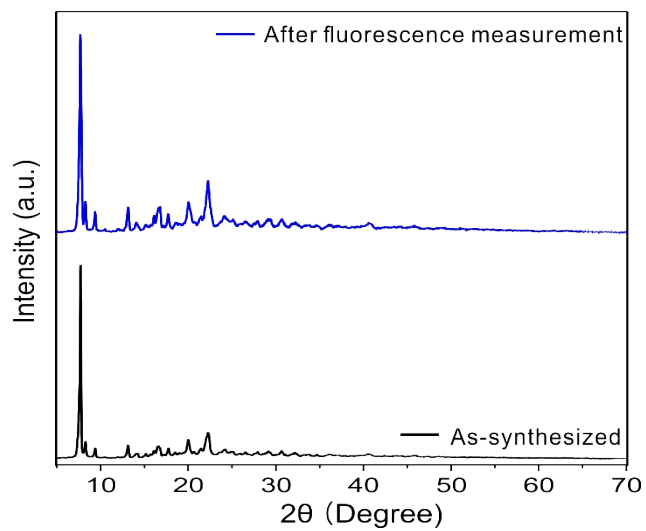

**Fig. S26** Fluorescence emission spectra of (*R,R*)-TBPG upon addition of (a) D- and (b) L-histidine

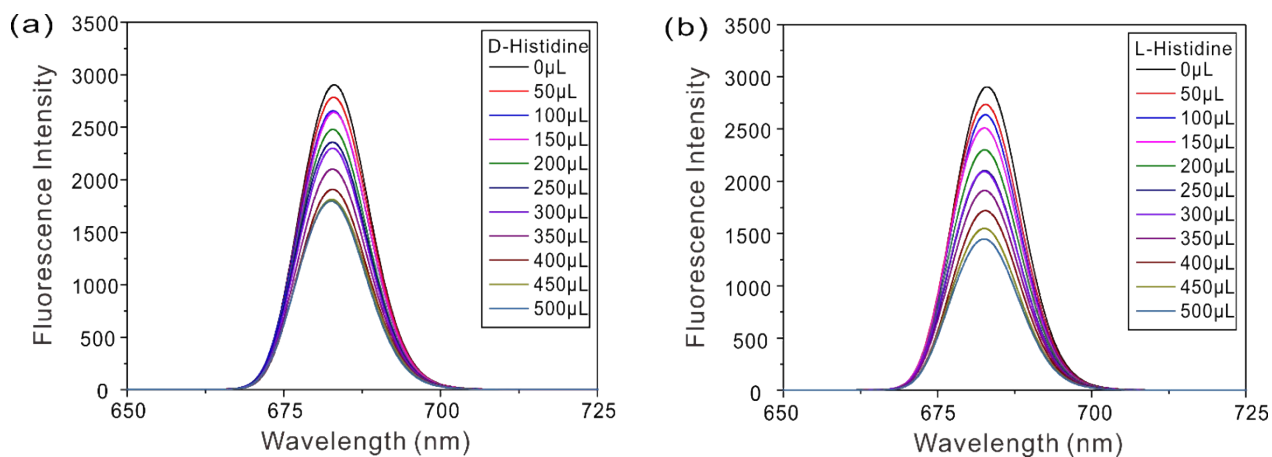

**Fig. S27** Stern-Volmer (SV) plots of (*R,R*)-TBPG + D-histidine and (*R,R*)-TBPG + L-histidine

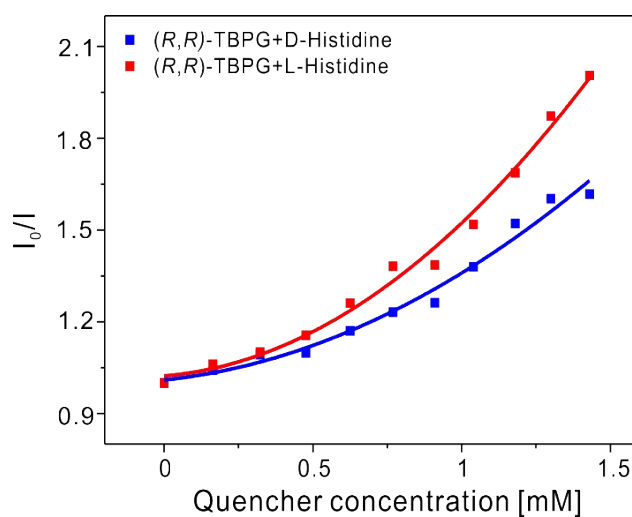



**Fig. S28** Fluorescence emission spectra of (*R*)-Zn upon addition of imidazole

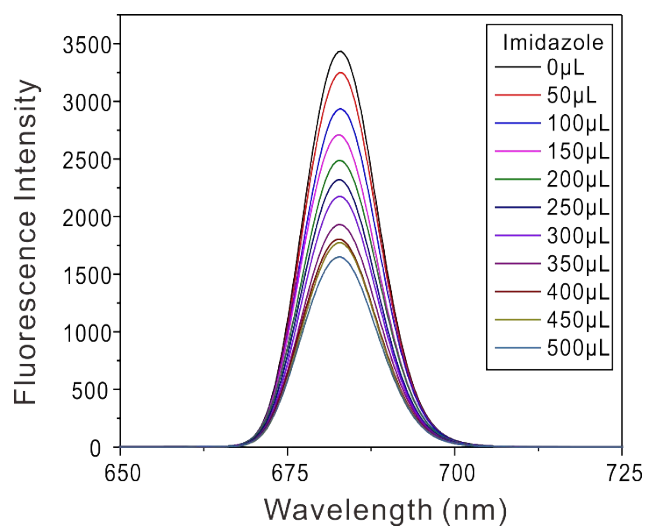

**Fig. S29** Stern-Volmer (SV) plots of (*R*)-Zn + D-histidine, (*R*)-Zn + L-histidine and (*R*)-Zn + imidazole. The  $K_{SV}$  constant for (*R*)-Zn + imidazole is  $7.6 \times 10^2 \text{ M}^{-1}$ .

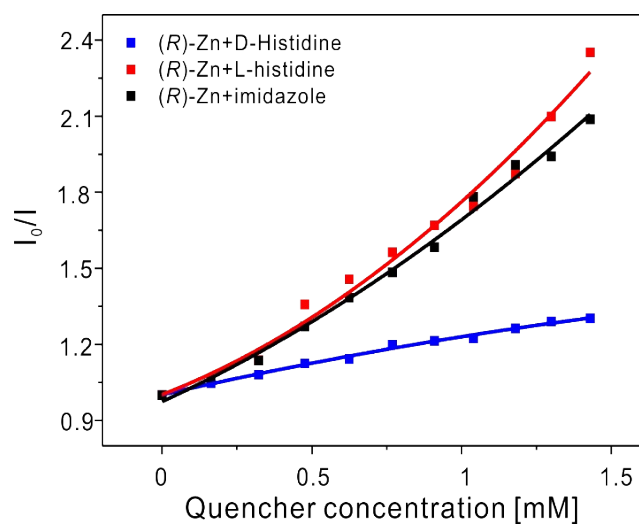

**Fig. S30**  $^1\text{H}$  NMR spectra for (*R*)-Zn in  $\text{DMSO-d}_6$ , (*R*)-Zn + Histidine in  $\text{DMSO-d}_6/\text{D}_2\text{O}$  and Histidine in  $\text{D}_2\text{O}$

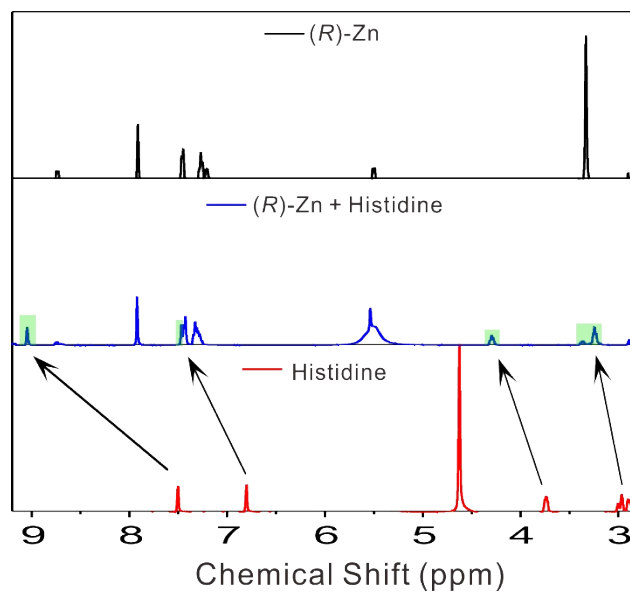

**Fig. S31** Fluorescence emission spectra of (S)-Zn upon addition of (a) D- and (b) L-histidine

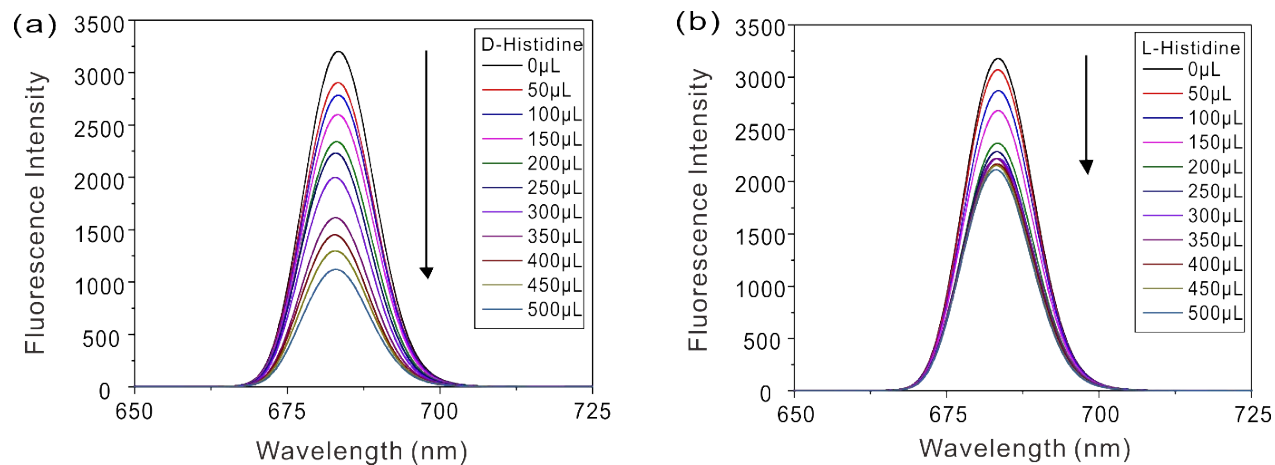

**Fig. S32** Stern-Volmer (SV) plots of (S)-Zn + D-Histidine and (S)-Zn + L-Histidine. The  $K_{SV}$  constants for (S)-Zn + D-histidine and (S)-Zn + L-histidine are  $1.5 \times 10^3 \text{ M}^{-1}$  and  $3.5 \times 10^2 \text{ M}^{-1}$ , respectively, and enantioselectivity factor  $\alpha$  is calculated to be 4.22.

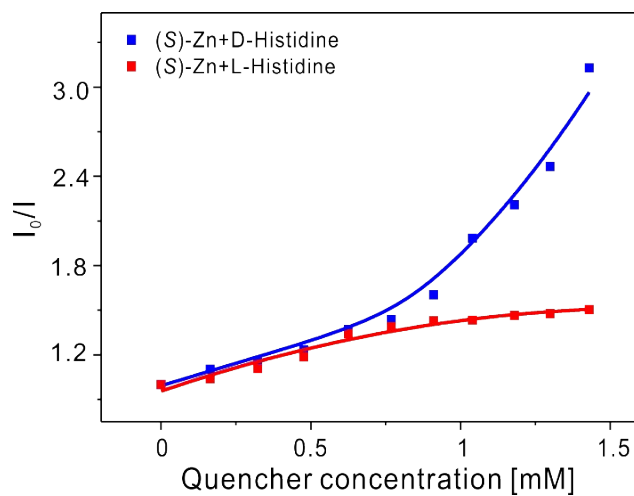

## References

1. SADABS, Siemens Industrial Automation Inc, *Madison, WI*, 1996.
2. Siemens, Area-Detector Control and Integration Software, *Siemens Analytical X-ray Instruments Inc., Madison, WI, USA*, 1996.
3. R. H. Blessing, An empirical correction for absorption anisotropy, *Acta Crystallogr., A, Found. Crystallogr.*, 1995, **51**, 33-38.
4. G. Sheldrick, SHELXS-2013/1, program for the solution of crystal structures, *Germany: University of Göttingen*, 2013.
5. G. M. Sheldrick, Crystal structure refinement with SHELXL, *Acta Crystallogr. C Struct. Chem.*, 2015, **71**, 3-8.
6. L. J. Farrugia, WinGX and ORTEP for Windows: an update, *J. Appl. Crystallogr.*, 2012, **45**, 849-854.
7. A. L. Spek, PLATON SQUEEZE: a tool for the calculation of the disordered solvent contribution to the calculated structure factors, *Acta Crystallogr. C Struct. Chem.*, 2015, **71**, 9-18.
8. A. Spek, Single-crystal structure validation with the program PLATON, *J. Appl. Crystallogr.*, 2003, **36**, 7-13.
9. Z. Otwinowski and W. Minor, in *Methods Enzymol.*, Elsevier, 1997, vol. 276, pp. 307-326.
10. P. Kubelka, Ein Beitrag zur Optik der Farbanstriche (Contribution to the optic of paint), *Z. Tech. Phys.*, 1931, **12**, 593-601.
11. P. Giannozzi, S. Baroni, N. Bonini, M. Calandra, R. Car, C. Cavazzoni, D. Ceresoli, G. L. Chiarotti, M. Cococcioni and I. Dabo, QUANTUM ESPRESSO: a modular and open-source software project for quantum simulations of materials, *J. Phys.: Condens. Matter*, 2009, **21**, 395502.
12. D. Vanderbilt, Soft self-consistent pseudopotentials in a generalized eigenvalue formalism, *Phys. Rev. B*, 1990, **41**, 7892.
13. J. P. Perdew, K. Burke and M. Ernzerhof, Generalized gradient approximation made simple, *Phys. Rev. Lett.*, 1996, **77**, 3865.
14. S. Kurtz and T. Perry, A powder technique for the evaluation of nonlinear optical materials, *J. Appl. Phys.*, 1968, **39**, 3798-3813.
15. K. M. Ok, E. O. Chi and P. S. Halasyamani, Bulk characterization methods for non-centrosymmetric materials: second-harmonic generation, piezoelectricity, pyroelectricity, and ferroelectricity, *Chem. Soc. Rev.*, 2006, **35**, 710-717.
